# Supplementary material for: ﻿A revision of the parasitoid wasp genus Alphomelon Mason with the description of 30 new species (Hymenoptera, Braconidae)
Source: PubMed Central journal article supplement (PMC10448698; doi:10.3897/zookeys.1175.105068), 2023-08-16
Supplement: zookeys-1175-005_article-105068__-s001.pdf [file zookeys-1175-005_article-105068__-s001.pdf]

# BOLD TaxonID Tree

Title : Tree Result - DS-ALPHOMEL (1295 records selected)  
Date : 13-Apr-2023  
Data Type : Nucleotide  
Distance Model : Kimura 2 Parameter  
Marker : COI-5P  
Colourization : [blue]=Stop Codons [red]=Contamination or misidentification

Label : Sample ID  
Label : Taxon  
Label : Country  
Label : Sequence Length  
Label : Barcode Cluster (BIN)

Filter : length > 300bp only  
Filter : exclude records flagged as misidentifications  
Filter : exclude records with stop codons  
Filter : exclude contaminants

Sequence Count : 1255  
Species count : 36  
Genus count : 1  
Family count : 1  
Unidentified : 17

BIN Count : 37

Alphomelon winniewertzae[1]|WMIC0092|United States|382|0n|  
Alphomelon Deans22[2]|DHJPAR0011859|Costa Rica|572|2n|BOLD: AAD2561  
Alphomelon Deans22[3]|DHJPAR0011845|Costa Rica|575|2n|BOLD: AAD2561  
Alphomelon Deans22[4]|DHJPAR0011838|Costa Rica|643|1n|BOLD: AAD2561  
Alphomelon Deans22[5]|DHJPAR0013665|Costa Rica|596|0n|BOLD: AAD2561  
Alphomelon Deans22[6]|DHJPAR0011852|Costa Rica|657|2n|BOLD: AAD2561  
Alphomelon Deans22[7]|DHJPAR00060662|Costa Rica|622|0n|BOLD: AAD2561  
Alphomelon Deans22[8]|DHJPAR0053814|Costa Rica|658|0n|BOLD: AAD2561  
Alphomelon Deans22[9]|DHJPAR0053819|Costa Rica|658|0n|BOLD: AAD2561  
Alphomelon Deans22[10]|DHJPAR0053835|Costa Rica|661|0n|BOLD: AAD2561  
Alphomelon Deans22[11]|DHJPAR0053837|Costa Rica|661|0n|BOLD: AAD2561  
Alphomelon Deans22[12]|DHJPAR0053842|Costa Rica|661|0n|BOLD: AAD2561  
Alphomelon Deans22[13]|DHJPAR0031007|Costa Rica|622|0n|BOLD: AAD2561  
Alphomelon Deans22[14]|DHJPAR0020201|Costa Rica|631|0n|BOLD: AAD2561  
Alphomelon[15]|07TAPACH-01765|Mexico|658|0n|BOLD: AAD2561  
Alphomelon Deans22[16]|DHJPAR0013671|Costa Rica|587|0n|BOLD: AAD2561  
Alphomelon Deans22[17]|DHJPAR0059077|Costa Rica|658|0n|BOLD: AAD2561  
Alphomelon Deans19[18]|DHJPAR0004808|Costa Rica|562|0n|BOLD: ACE5969  
Alphomelon Deans19[19]|DHJPAR0054776|Costa Rica|658|0n|BOLD: ACE5969  
Alphomelon Deans19[20]|DHJPAR0058249|Costa Rica|658|0n|BOLD: ACE5969  
Alphomelon Deans19[21]|DHJPAR0058266|Costa Rica|658|0n|BOLD: ACE5969  
Alphomelon Deans19[22]|DHJPAR0058281|Costa Rica|658|0n|BOLD: ACE5969  
Alphomelon Deans19[23]|DHJPAR0012427|Costa Rica|657|0n|BOLD: ACE5969  
Alphomelon Deans19[24]|DHJPAR0012411|Costa Rica|657|0n|BOLD: ACE5969  
Alphomelon Deans19[25]|DHJPAR0012401|Costa Rica|657|0n|BOLD: ACE5969  
Alphomelon Deans19[26]|DHJPAR0058280|Costa Rica|658|0n|BOLD: ACE5969  
Alphomelon Deans19[27]|DHJPAR0058260|Costa Rica|658|0n|BOLD: ACE5969  
Alphomelon Deans19[28]|DHJPAR0012860|Costa Rica|657|0n|BOLD: ACE5969  
Alphomelon[29]|07TAPACH-00453|Mexico|398|0n|  
Alphomelon xestopygaDHJ05[30]|DHJPAR0002449|Costa Rica|657|1n|BOLD: AAA1634  
Alphomelon xestopygaDHJ05[31]|DHJPAR0012390|Costa Rica|657|1n|BOLD: AAA1634  
Alphomelon xestopygaDHJ05[32]|DHJPAR0002411|Costa Rica|657|1n|BOLD: AAA1634  
Alphomelon xestopygaDHJ05[33]|DHJPAR0013158|Costa Rica|657|3n|BOLD: AAA1634  
Alphomelon xestopygaDHJ05[34]|DHJPAR0020278|Costa Rica|656|0n|BOLD: AAA1634  
Alphomelon xestopygaDHJ05[35]|DHJPAR0002351|Costa Rica|656|0n|BOLD: AAA1634  
Alphomelon xestopygaDHJ05[36]|DHJPAR0013155|Costa Rica|656|0n|BOLD: AAA1634  
Alphomelon xestopygaDHJ05[37]|BIOUG50473-F05|Costa Rica|655|0n|BOLD: AAA1634  
Alphomelon xestopygaDHJ05[38]|DHJPAR0002399|Costa Rica|656|1n|BOLD: AAA1634  
Alphomelon xestopygaDHJ05[39]|DHJPAR0020285|Costa Rica|656|0n|BOLD: AAA1634  
Alphomelon xestopygaDHJ05[40]|DHJPAR0004906|Costa Rica|633|0n|BOLD: AAA1634  
Alphomelon xestopygaDHJ05[41]|DHJPAR0012127|Costa Rica|577|0n|BOLD: AAA1634  
Alphomelon xestopygaDHJ05[42]|DHJPAR0031122|Costa Rica|632|0n|BOLD: AAA1634  
Alphomelon xestopygaDHJ05[43]|DHJPAR0003051|Costa Rica|631|0n|BOLD: AAA1634  
Alphomelon xestopygaDHJ05[44]|DHJPAR0004813|Costa Rica|652|5n|BOLD: AAA1634  
Alphomelon xestopygaDHJ05[45]|DHJPAR0031135|Costa Rica|608|0n|BOLD: AAA1634  
Alphomelon xestopygaDHJ05[46]|DHJPAR0002438|Costa Rica|657|0n|BOLD: AAA1634  
Alphomelon xestopygaDHJ05[47]|DHJPAR0002412|Costa Rica|657|0n|BOLD: AAA1634  
Alphomelon xestopygaDHJ05[48]|DHJPAR0002361|Costa Rica|657|0n|BOLD: AAA1634  
Alphomelon xestopygaDHJ05[49]|DHJPAR0002357|Costa Rica|657|0n|BOLD: AAA1634  
Alphomelon xestopygaDHJ05[50]|DHJPAR0002427|Costa Rica|657|0n|BOLD: AAA1634  
Alphomelon xestopygaDHJ05[51]|DHJPAR0002425|Costa Rica|657|0n|BOLD: AAA1634  
Alphomelon xestopygaDHJ05[52]|DHJPAR0058955|Costa Rica|661|0n|BOLD: AAA1634  
Alphomelon xestopygaDHJ05[53]|DHJPAR0058915|Costa Rica|658|0n|BOLD: AAA1634  
Alphomelon xestopygaDHJ05[54]|DHJPAR0020290|Costa Rica|657|0n|BOLD: AAA1634  
Alphomelon xestopygaDHJ05[55]|DHJPAR0013157|Costa Rica|657|0n|BOLD: AAA1634  
Alphomelon xestopygaDHJ05[56]|DHJPAR0012407|Costa Rica|657|0n|BOLD: AAA1634  
Alphomelon xestopygaDHJ05[57]|DHJPAR0002496|Costa Rica|657|0n|BOLD: AAA1634  
Alphomelon xestopygaDHJ05[58]|DHJPAR0004641|Costa Rica|657|0n|BOLD: AAA1634  
Alphomelon xestopygaDHJ05[59]|DHJPAR0012418|Costa Rica|657|0n|BOLD: AAA1634  
Alphomelon xestopygaDHJ05[60]|DHJPAR0004648|Costa Rica|657|0n|BOLD: AAA1634  
Alphomelon xestopygaDHJ05[61]|DHJPAR0004646|Costa Rica|657|0n|BOLD: AAA1634  
Alphomelon xestopygaDHJ05[62]|DHJPAR0004672|Costa Rica|657|0n|BOLD: AAA1634  
Alphomelon xestopygaDHJ05[63]|DHJPAR0004659|Costa Rica|657|0n|BOLD: AAA1634  
Alphomelon xestopygaDHJ05[64]|DHJPAR0004676|Costa Rica|657|0n|BOLD: AAA1634  
Alphomelon xestopygaDHJ05[65]|DHJPAR0004675|Costa Rica|657|0n|BOLD: AAA1634  
Alphomelon xestopygaDHJ05[66]|DHJPAR0004679|Costa Rica|657|0n|BOLD: AAA1634  
Alphomelon xestopygaDHJ05[67]|DHJPAR0004678|Costa Rica|657|0n|BOLD: AAA1634  
Alphomelon xestopygaDHJ05[68]|DHJPAR0004683|Costa Rica|657|0n|BOLD: AAA1634  
Alphomelon xestopygaDHJ05[69]|DHJPAR0004681|Costa Rica|657|0n|BOLD: AAA1634  
Alphomelon xestopygaDHJ05[70]|DHJPAR0012392|Costa Rica|618|0n|BOLD: AAA1634  
Alphomelon xestopygaDHJ05[71]|DHJPAR0011926|Costa Rica|657|1n|BOLD: AAA1634  
Alphomelon xestopygaDHJ05[72]|DHJPAR0002354|Costa Rica|657|0n|BOLD: AAA1634  
Alphomelon xestopygaDHJ05[73]|DHJPAR0002346|Costa Rica|657|0n|BOLD: AAA1634  
Alphomelon xestopygaDHJ05[74]|DHJPAR0002374|Costa Rica|657|0n|BOLD: AAA1634  
Alphomelon xestopygaDHJ05[75]|DHJPAR0002370|Costa Rica|657|0n|BOLD: AAA1634  
Alphomelon xestopygaDHJ05[76]|DHJPAR0002382|Costa Rica|657|0n|BOLD: AAA1634  
Alphomelon xestopygaDHJ05[77]|DHJPAR0002379|Costa Rica|657|0n|BOLD: AAA1634  
Alphomelon xestopygaDHJ05[78]|DHJPAR0058159|Costa Rica|658|0n|BOLD: AAA1634  
Alphomelon xestopygaDHJ05[79]|DHJPAR0002388|Costa Rica|657|0n|BOLD: AAA1634  
Alphomelon xestopygaDHJ05[80]|DHJPAR0011928|Costa Rica|657|0n|BOLD: AAA1634  
Alphomelon xestopygaDHJ05[81]|DHJPAR0011927|Costa Rica|657|0n|BOLD: AAA1634  
Alphomelon xestopygaDHJ05[82]|DHJPAR0002421|Costa Rica|657|0n|BOLD: AAA1634  
Alphomelon xestopygaDHJ05[83]|DHJPAR0002417|Costa Rica|657|0n|BOLD: AAA1634  
Alphomelon xestopygaDHJ05[84]|DHJPAR0060130|Costa Rica|658|0n|BOLD: AAA1634  
Alphomelon xestopygaDHJ05[85]|DHJPAR0002433|Costa Rica|657|0n|BOLD: AAA1634  
Alphomelon xestopygaDHJ05[86]|DHJPAR0013163|Costa Rica|657|0n|BOLD: AAA1634  
Alphomelon xestopygaDHJ05[87]|DHJPAR0058858|Costa Rica|658|0n|BOLD: AAA1634  
Alphomelon xestopygaDHJ05[88]|DHJPAR0058879|Costa Rica|658|0n|BOLD: AAA1634  
Alphomelon xestopygaDHJ05[89]|DHJPAR0013167|Costa Rica|657|0n|BOLD: AAA1634  
Alphomelon xestopygaDHJ05[90]|DHJPAR0002441|Costa Rica|657|0n|BOLD: AAA1634  
Alphomelon xestopygaDHJ05[91]|DHJPAR0061612|Costa Rica|658|0n|BOLD: AAA1634  
Alphomelon xestopygaDHJ05[92]|DHJPAR0002451|Costa Rica|657|0n|BOLD: AAA1634  
Alphomelon xestopygaDHJ05[93]|DHJPAR0002444|Costa Rica|657|0n|BOLD: AAA1634  
Alphomelon xestopygaDHJ05[94]|DHJPAR0002493|Costa Rica|657|0n|BOLD: AAA1634  
Alphomelon xestopygaDHJ05[95]|DHJPAR0002492|Costa Rica|657|0n|BOLD: AAA1634  
Alphomelon xestopygaDHJ05[96]|DHJPAR0061687|Costa Rica|658|0n|BOLD: AAA1634  
Alphomelon xestopygaDHJ05[97]|DHJPAR0002495|Costa Rica|657|0n|BOLD: AAA1634





Alphomelon xestopygaDHJ05[288]DHJP000029/Costa Rica[658]Un||BOLD:AAA1634  
Alphomelon xestopygaDHJ05[289]DHJP00004936/Costa Rica[657]On||BOLD:AAA1634  
Alphomelon xestopygaDHJ05[290]DHJP00031113/Costa Rica[658]On||BOLD:AAA1634  
Alphomelon xestopygaDHJ05[291]DHJP00031121/Costa Rica[658]On||BOLD:AAA1634  
Alphomelon xestopygaDHJ05[292]DHJP00053792/Costa Rica[658]On||BOLD:AAA1634  
Alphomelon xestopygaDHJ05[293]DHJP0005039/Costa Rica[657]On||BOLD:AAA1634  
Alphomelon xestopygaDHJ05[294]DHJP0002413/Costa Rica[657]On||BOLD:AAA1634  
Alphomelon xestopygaDHJ05[295]DHJP00059753/Costa Rica[658]On||BOLD:AAA1634  
Alphomelon xestopygaDHJ05[296]DHJP00056746/Costa Rica[658]On||BOLD:AAA1634  
Alphomelon xestopygaDHJ05[297]DHJP00012395/Costa Rica[657]On||BOLD:AAA1634  
Alphomelon xestopygaDHJ05[298]DHJP00031616/Costa Rica[658]On||BOLD:AAA1634  
Alphomelon xestopygaDHJ05[299]DHJP00012876/Costa Rica[657]3n||BOLD:AAA1634  
Alphomelon xestopygaDHJ05[300]DHJP00013171/Costa Rica[656]On||BOLD:AAA1634  
Alphomelon xestopygaDHJ05[301]DHJP00030809/Costa Rica[657]On||BOLD:AAA1634  
Alphomelon xestopygaDHJ05[302]DHJP00004957/Costa Rica[657]1n||BOLD:AAA1634  
Alphomelon xestopygaDHJ05[303]DHJP00004966/Costa Rica[657]4n||BOLD:AAA1634  
Alphomelon xestopygaDHJ05[304]DHJP00013161/Costa Rica[657]1n||BOLD:AAA1634  
Alphomelon xestopygaDHJ05[305]DHJP00013154/Costa Rica[656]5n||BOLD:AAA1634  
Alphomelon xestopygaDHJ05[306]DHJP00031114/Costa Rica[644]On||BOLD:AAA1634  
Alphomelon xestopygaDHJ05[307]DHJP00031117/Costa Rica[623]On||BOLD:AAA1634  
Alphomelon xestopygaDHJ05[308]DHJP00012128/Costa Rica[565]On||BOLD:AAA1634  
Alphomelon xestopygaDHJ05[309]DHJP0002446/Costa Rica[575]6n||BOLD:AAA1634  
Alphomelon xestopygaDHJ05[310]DHJP00058849/Costa Rica[615]On||BOLD:AAA1634  
Alphomelon xestopygaDHJ05[311]DHJP0002385/Costa Rica[657]1n||BOLD:AAA1634  
Alphomelon xestopygaDHJ05[312]DHJP00020277/Costa Rica[657]1n||BOLD:AAA1634  
Alphomelon xestopygaDHJ05[313]DHJP0002369/Costa Rica[657]On||BOLD:AAA1634  
Alphomelon xestopygaDHJ05[314]DHJP0002345/Costa Rica[657]On||BOLD:AAA1634  
Alphomelon xestopygaDHJ05[315]DHJP0002390/Costa Rica[657]On||BOLD:AAA1634  
Alphomelon xestopygaDHJ05[316]DHJP0002378/Costa Rica[657]On||BOLD:AAA1634  
Alphomelon xestopygaDHJ05[317]DHJP00031682/Costa Rica[658]On||BOLD:AAA1634  
Alphomelon xestopygaDHJ05[318]DHJP0002426/Costa Rica[657]On||BOLD:AAA1634  
Alphomelon xestopygaDHJ05[319]DHJP0002404/Costa Rica[657]1n||BOLD:AAA1634  
Alphomelon xestopygaDHJ05[320]DHJP0002377/Costa Rica[657]On||BOLD:AAA1634  
Alphomelon xestopygaDHJ05[321]DHJP00053755/Costa Rica[658]On||BOLD:AAA1634  
Alphomelon xestopygaDHJ05[322]DHJP0002422/Costa Rica[657]On||BOLD:AAA1634  
Alphomelon xestopygaDHJ05[323]DHJP00031107/Costa Rica[658]On||BOLD:AAA1634  
Alphomelon xestopygaDHJ05[324]DHJP00020295/Costa Rica[657]1n||BOLD:AAA1634  
Alphomelon xestopygaDHJ05[325]DHJP0002423/Costa Rica[657]1n||BOLD:AAA1634  
Alphomelon xestopygaDHJ05[326]DHJP0002360/Costa Rica[657]1n||BOLD:AAA1634  
Alphomelon xestopygaDHJ05[327]DHJP0002402/Costa Rica[657]1n||BOLD:AAA1634  
Alphomelon xestopygaDHJ05[328]DHJP0002414/Costa Rica[657]1n||BOLD:AAA1634  
Alphomelon xestopygaDHJ05[329]DHJP0002348/Costa Rica[563]On||BOLD:AAA1634  
Alphomelon xestopygaDHJ05[330]DHJP00012397/Costa Rica[381]1n||BOLD:AAA1634  
Alphomelon xestopygaDHJ05[331]DHJP00004812/Costa Rica[564]On||BOLD:AAA1634  
Alphomelon xestopygaDHJ05[332]BIOUG17841-A01/Costa Rica[579]On||BOLD:AAA1634  
Alphomelon xestopygaDHJ05[333]DHJP00059742/Costa Rica[658]1n||BOLD:AAA1634  
Alphomelon xestopygaDHJ05[334]DHJP0005041/Costa Rica[607]8n||BOLD:AAA1634  
Alphomelon talidicida[335]CNCHYM 00053/Trinidad and Tobago[461]5n||BOLD:AAA1634  
Alphomelon xestopygaDHJ05[336]DHJP0005049/Costa Rica[643]45n||BOLD:AAA1634  
Alphomelon xestopygaDHJ07[337]DHJP0005052/Costa Rica[657]3n||BOLD:AAE5701  
Alphomelon xestopygaDHJ07[338]DHJP0005048/Costa Rica[619]4n||BOLD:AAE5701  
Alphomelon xestopygaDHJ05[339]DHJP00011849/Costa Rica[538]10n||BOLD:AAE5701  
Alphomelon Deans11[340]DHJP00013805/Costa Rica[575]On||BOLD:AAB4029  
Alphomelon Deans11[341]DHJP0002469/Costa Rica[605]1n||BOLD:AAB4029  
Alphomelon Deans11[342]DHJP00004892/Costa Rica[657]1n||BOLD:AAB4029  
Alphomelon Deans11[343]DHJP00005057/Costa Rica[657]On||BOLD:AAB4029  
Alphomelon Deans11[344]DHJP00012708/Costa Rica[657]On||BOLD:AAB4029  
Alphomelon Deans11[345]DHJP00030806/Costa Rica[657]On||BOLD:AAB4029  
Alphomelon Deans11[346]DHJP00004939/Costa Rica[657]On||BOLD:AAB4029  
Alphomelon Deans11[347]DHJP00004649/Costa Rica[657]On||BOLD:AAB4029  
Alphomelon Deans11[348]DHJP0002396/Costa Rica[657]On||BOLD:AAB4029  
Alphomelon Deans11[349]DHJP00012704/Costa Rica[657]On||BOLD:AAB4029  
Alphomelon Deans11[350]DHJP00061686/Costa Rica[658]On||BOLD:AAB4029  
Alphomelon Deans11[351]DHJP0002443/Costa Rica[657]On||BOLD:AAB4029  
Alphomelon Deans11[352]DHJP00004664/Costa Rica[657]On||BOLD:AAB4029  
Alphomelon Deans11[353]DHJP00004647/Costa Rica[657]On||BOLD:AAB4029  
Alphomelon Deans11[354]DHJP00004643/Costa Rica[657]On||BOLD:AAB4029  
Alphomelon Deans11[355]DHJP00004893/Costa Rica[657]On||BOLD:AAB4029  
Alphomelon Deans11[356]DHJP00012396/Costa Rica[657]On||BOLD:AAB4029  
Alphomelon Deans11[357]DHJP0002478/Costa Rica[627]On||BOLD:AAB4029  
Alphomelon Deans11[358]DHJP0002482/Costa Rica[340]3n||BOLD:AAB4029  
Alphomelon Deans11[359]DHJP0002466/Costa Rica[657]1n||BOLD:AAB4029  
Alphomelon Deans11[360]DHJP0002455/Costa Rica[657]On||BOLD:AAB4029  
Alphomelon Deans11[361]DHJP0002467/Costa Rica[657]On||BOLD:AAB4029  
Alphomelon Deans11[362]DHJP0002291/Costa Rica[657]2n||BOLD:AAB4029  
Alphomelon Deans11[363]DHJP00004684/Costa Rica[657]On||BOLD:AAB4029  
Alphomelon Deans11[364]DHJP00004658/Costa Rica[657]On||BOLD:AAB4029  
Alphomelon Deans11[365]DHJP00011847/Costa Rica[657]On||BOLD:AAB4029  
Alphomelon xestopygaDHJ02[366]DHJP00004891/Costa Rica[657]1n||BOLD:AAE2209  
Alphomelon xestopygaDHJ02[367]DHJP00012804/Costa Rica[657]1n||BOLD:AAE2209  
Alphomelon xestopygaDHJ02[368]DHJP0005033/Costa Rica[657]1n||BOLD:AAE2209  
Alphomelon xestopygaDHJ02[369]DHJP00056876/Costa Rica[661]On||BOLD:AAE2209  
Alphomelon xestopygaDHJ02[370]DHJP00061727/Costa Rica[658]On||BOLD:AAE2209  
Alphomelon xestopygaDHJ02[371]DHJP00060628/Costa Rica[658]On||BOLD:AAE2209  
Alphomelon xestopygaDHJ02[372]DHJP00056782/Costa Rica[658]On||BOLD:AAE2209  
Alphomelon xestopygaDHJ02[373]DHJP00060651/Costa Rica[658]On||BOLD:AAE2209  
Alphomelon xestopygaDHJ02[374]DHJP00005017/Costa Rica[657]1n||BOLD:AAE2209  
Alphomelon xestopygaDHJ02[375]DHJP00004880/Costa Rica[657]3n||BOLD:AAE2209  
Alphomelon xestopygaDHJ01[376]DHJP0005056/Costa Rica[627]On||BOLD:AAR3557  
Alphomelon xestopygaDHJ01[377]DHJP00059743/Costa Rica[658]On||BOLD:AAR3557  
Alphomelon xestopygaDHJ03[378]DHJP00038114/Costa Rica[658]On||BOLD:AAJ2210  
Alphomelon xestopygaDHJ03[379]DHJP00049235/Costa Rica[658]On||BOLD:AAJ2210  
Alphomelon xestopygaDHJ03[380]DHJP00056010/Costa Rica[670]On||BOLD:AAJ2210  
Alphomelon xestopygaDHJ03[381]DHJP00039874/Costa Rica[658]On||BOLD:AAJ2210  
Alphomelon xestopygaDHJ03[382]DHJP0002292/Costa Rica[657]5n||BOLD:AAJ2210  
Alphomelon xestopygaDHJ03[383]DHJP00011856/Costa Rica[657]1n||BOLD:AAJ2210  
Alphomelon Deans08[384]DHJP00030774/Costa Rica[629]On||BOLD:AAE2229  
Alphomelon Deans08[385]DHJP00059731/Costa Rica[658]On||BOLD:AAE2229  
Alphomelon Deans08[386]DHJP00049085/Costa Rica[658]On||BOLD:AAE2229  
Alphomelon Deans08[387]DHJP00020885/Costa Rica[657]On||BOLD:AAE2229

Alphomelon Deans08[385]DHJPAR0059731Costa Rica[658[0n]]BOLD:AAE2229  
Alphomelon Deans08[386]DHJPAR0049085Costa Rica[658[0n]]BOLD:AAE2229  
Alphomelon Deans08[387]DHJPAR0020885Costa Rica[657[0n]]BOLD:AAE2229  
Alphomelon Deans08[388]DHJPAR0004948Costa Rica[657[1n]]BOLD:AAE2229  
Alphomelon Deans08[389]DHJPAR0002471Costa Rica[583[4n]]BOLD:AAE2229  
Alphomelon Deans08[390]DHJPAR0002470Costa Rica[657[2n]]BOLD:AAE2229  
Alphomelon Deans08[391]DHJPAR0042940Costa Rica[658[0n]]BOLD:AAE2229  
Alphomelon Deans08[392]DHJPAR0042931Costa Rica[658[0n]]BOLD:AAE2229  
Alphomelon Deans08[393]DHJPAR0060226Costa Rica[658[0n]]BOLD:AAE2229  
Alphomelon bromeliphile[394]DHJPAR0004951Costa Rica[353[4n]]  
Alphomelon bromeliphile[395]DHJPAR0005045Costa Rica[641[0n]]BOLD:AAB5598  
Alphomelon bromeliphile[396]DHJPAR0003979Costa Rica[626[1n]]BOLD:AAB5598  
Alphomelon bromeliphile[397]DHJPAR00051200Costa Rica[626[0n]]BOLD:AAB5598  
Alphomelon bromeliphile[398]DHJPAR0005029Costa Rica[614[0n]]BOLD:AAB5598  
Alphomelon bromeliphile[399]DHJPAR0004958Costa Rica[657[12n]]  
Alphomelon bromeliphile[400]DHJPAR0004905Costa Rica[657[0n]]BOLD:AAB5598  
Alphomelon bromeliphile[401]DHJPAR0004674Costa Rica[657[0n]]BOLD:AAB5598  
Alphomelon bromeliphile[402]DHJPAR0004950Costa Rica[657[0n]]BOLD:AAB5598  
Alphomelon bromeliphile[403]DHJPAR0012700Costa Rica[657[0n]]BOLD:AAB5598  
Alphomelon bromeliphile[404]DHJPAR0012702Costa Rica[657[0n]]BOLD:AAB5598  
Alphomelon bromeliphile[405]DHJPAR0031657Costa Rica[658[0n]]BOLD:AAB5598  
Alphomelon bromeliphile[406]DHJPAR0031669Costa Rica[658[0n]]BOLD:AAB5598  
Alphomelon bromeliphile[407]DHJPAR0031621Costa Rica[658[0n]]BOLD:AAB5598  
Alphomelon bromeliphile[408]DHJPAR0012697Costa Rica[657[0n]]BOLD:AAB5598  
Alphomelon bromeliphile[409]DHJPAR0012698Costa Rica[657[0n]]BOLD:AAB5598  
Alphomelon bromeliphile[410]DHJPAR0012706Costa Rica[657[0n]]BOLD:AAB5598  
Alphomelon bromeliphile[411]DHJPAR0011842Costa Rica[657[3n]]BOLD:AAB5598  
Alphomelon bromeliphile[412]DHJPAR0005050Costa Rica[657[1n]]BOLD:AAB5598  
Alphomelon bromeliphile[413]DHJPAR0004972Costa Rica[657[4n]]BOLD:AAB5598  
Alphomelon bromeliphile[414]DHJPAR0005064Costa Rica[655[2n]]BOLD:AAB5598  
Alphomelon bromeliphile[415]DHJPAR0005053Costa Rica[657[4n]]BOLD:AAB5598  
Alphomelon bromeliphile[416]DHJPAR0005047Costa Rica[657[3n]]BOLD:AAB5598  
Alphomelon bromeliphile[417]DHJPAR0004955Costa Rica[657[2n]]BOLD:AAB5598  
Alphomelon bromeliphile[418]DHJPAR0011924Costa Rica[657[1n]]BOLD:AAB5598  
Alphomelon bromeliphile[419]DHJPAR0011840Costa Rica[657[1n]]BOLD:AAB5598  
Alphomelon Deans09[420]DHJPAR0047095Costa Rica[627[0n]]BOLD:ABU7420  
Alphomelon Deans09[421]DHJPAR0002445Costa Rica[657[0n]]BOLD:ABU7420  
Alphomelon Deans09[422]DHJPAR0047120Costa Rica[658[0n]]BOLD:ABU7420  
Alphomelon Deans09[423]DHJPAR0049095Costa Rica[658[0n]]BOLD:ABU7420  
Alphomelon Deans09[424]DHJPAR0012400Costa Rica[657[0n]]BOLD:ABU7420  
Alphomelon Deans09[425]DHJPAR00057788Costa Rica[661[0n]]BOLD:ABU7420  
Alphomelon Deans09[426]DHJPAR00057786Costa Rica[661[0n]]BOLD:ABU7420  
Alphomelon Deans09[427]DHJPAR0012416Costa Rica[657[0n]]BOLD:ABU7420  
Alphomelon Deans09[428]DHJPAR00038112Costa Rica[658[0n]]BOLD:ABU7420  
Alphomelon Deans09[429]DHJPAR0041758Costa Rica[658[0n]]BOLD:ABU7420  
Alphomelon Deans09[430]DHJPAR0041807Costa Rica[658[0n]]BOLD:ABU7420  
Alphomelon Deans09[431]DHJPAR0049225Costa Rica[658[0n]]BOLD:ABU7420  
Alphomelon Deans09[432]DHJPAR0041820Costa Rica[658[0n]]BOLD:ABU7420  
Alphomelon Deans09[433]DHJPAR0025653Costa Rica[657[0n]]BOLD:ABU7420  
Alphomelon Deans09[434]DHJPAR00057793Costa Rica[661[0n]]BOLD:ABU7420  
Alphomelon Deans09[435]DHJPAR0012701Costa Rica[657[0n]]BOLD:ABU7420  
Alphomelon Deans09[436]DHJPAR0004885Costa Rica[657[1n]]BOLD:ABU7420  
Alphomelon Deans09[437]DHJPAR0045224Costa Rica[658[1n]]BOLD:ABU7420  
Alphomelon Deans09[438]DHJPAR0004935Costa Rica[657[1n]]BOLD:ABU7420  
Alphomelon Deans09[439]DHJPAR0004940Costa Rica[657[1n]]BOLD:ABU7420  
Alphomelon Deans09[440]DHJPAR00005116Costa Rica[657[1n]]BOLD:ABU7420  
Alphomelon Deans09[441]DHJPAR0004882Costa Rica[657[1n]]BOLD:ABU7420  
Alphomelon Deans09[442]DHJPAR0012857Costa Rica[629[0n]]BOLD:ABU7420  
Alphomelon Deans09[443]DHJPAR0058212Costa Rica[658[0n]]BOLD:ABU7420  
Alphomelon Deans09[444]DHJPAR00058207Costa Rica[658[0n]]BOLD:ABU7420  
Alphomelon Deans09[445]DHJPAR00058201Costa Rica[658[0n]]BOLD:ABU7420  
Alphomelon Deans09[446]DHJPAR00058161Costa Rica[658[0n]]BOLD:ABU7420  
Alphomelon Deans09[447]DHJPAR00058153Costa Rica[658[0n]]BOLD:ABU7420  
Alphomelon Deans09[448]DHJPAR0062108Costa Rica[658[0n]]BOLD:ABU7420  
Alphomelon Deans09[449]DHJPAR00059482Costa Rica[658[0n]]BOLD:ABU7420  
Alphomelon Deans09[450]DHJPAR00038270Costa Rica[658[0n]]BOLD:ABU7420  
Alphomelon Deans09[451]DHJPAR00058838Costa Rica[658[0n]]BOLD:ABU7420  
Alphomelon Deans09[452]DHJPAR0012699Costa Rica[657[0n]]BOLD:ABU7420  
Alphomelon Deans09[453]DHJPAR00038962Costa Rica[658[0n]]BOLD:ABU7420  
Alphomelon Deans09[454]DHJPAR00038957Costa Rica[658[0n]]BOLD:ABU7420  
Alphomelon Deans09[455]DHJPAR0012859Costa Rica[657[0n]]BOLD:ABU7420  
Alphomelon[456]CCDB-07374 F11[French Guiana][658[0n]]BOLD:AAV7443  
Alphomelon Deans12[457]DHJPAR0004805Costa Rica[554[1n]]BOLD:AAB7535  
Alphomelon Deans12[458]DHJPAR0031126Costa Rica[622[0n]]BOLD:AAB7535  
Alphomelon Deans12[459]DHJPAR0004654Costa Rica[657[0n]]BOLD:AAB7535  
Alphomelon Deans12[460]DHJPAR0005019Costa Rica[654[0n]]BOLD:AAB7535  
Alphomelon Deans12[461]DHJPAR0004917Costa Rica[657[1n]]BOLD:AAB7535  
Alphomelon Deans12[462]DHJPAR0012414Costa Rica[657[0n]]BOLD:AAB7535  
Alphomelon Deans12[463]DHJPAR0002460Costa Rica[657[0n]]BOLD:AAB7535  
Alphomelon Deans12[464]DHJPAR00058188Costa Rica[658[0n]]BOLD:AAB7535  
Alphomelon Deans12[465]DHJPAR00058190Costa Rica[658[0n]]BOLD:AAB7535  
Alphomelon Deans12[466]DHJPAR00058209Costa Rica[658[0n]]BOLD:AAB7535  
Alphomelon Deans12[467]DHJPAR00054695Costa Rica[658[0n]]BOLD:AAB7535  
Alphomelon Deans12[468]DHJPAR0064147Costa Rica[658[0n]]BOLD:AAB7535  
Alphomelon Deans12[469]DHJPAR0012120Costa Rica[657[0n]]BOLD:AAB7535  
Alphomelon Deans12[470]DHJPAR00030875Costa Rica[657[0n]]BOLD:AAB7535  
Alphomelon Deans12[471]DHJPAR00030883Costa Rica[657[0n]]BOLD:AAB7535  
Alphomelon Deans12[472]DHJPAR00030932Costa Rica[657[0n]]BOLD:AAB7535  
Alphomelon Deans12[473]DHJPAR00020276Costa Rica[657[0n]]BOLD:AAB7535  
Alphomelon Deans12[474]DHJPAR0012710Costa Rica[657[0n]]BOLD:AAB7535  
Alphomelon Deans12[475]DHJPAR00004924Costa Rica[657[1n]]BOLD:AAB7535  
Alphomelon Deans12[476]DHJPAR00025847Costa Rica[656[0n]]BOLD:AAB7535  
Alphomelon Deans12[477]BIOUG19726-B08Costa Rica[588[0n]]BOLD:AAB7535  
Alphomelon Deans12[478]BIOUG28011-A06Costa Rica[600[0n]]BOLD:AAB7535  
Alphomelon Deans12[479]DHJPAR0004888Costa Rica[657[3n]]BOLD:AAB7535  
Alphomelon Deans12[480]DHJPAR00020280Costa Rica[657[0n]]BOLD:AAB7535  
Alphomelon Deans12[481]DHJPAR00058963Costa Rica[661[0n]]BOLD:AAB7535  
Alphomelon Deans12[482]DHJPAR00058962Costa Rica[661[0n]]BOLD:AAB7535  
Alphomelon Deans12[483]DHJPAR0012863Costa Rica[657[0n]]BOLD:AAB7535

Alphomelon Deans 12[482]DHJPAR0058962|Costa Rica|661[0n]|BOLD:AA67535  
Alphomelon Deans 12[483]DHJPAR0012863|Costa Rica|657[0n]|BOLD:AA67535  
Alphomelon Deans 12[484]DHJPAR0060154|Costa Rica|658[0n]|BOLD:AA67535  
Alphomelon Deans 13[485]DHJPAR0004802|Costa Rica|567[2n]|BOLD:AAA6775  
Alphomelon Deans 13[486]DHJPAR0057765|Costa Rica|623[0n]|BOLD:AAA6775  
Alphomelon Deans 13[487]DHJPAR0031132|Costa Rica|632[0n]|BOLD:AAA6775  
Alphomelon Deans 13[488]DHJPAR0004898|Costa Rica|595[5n]|BOLD:AAA6775  
Alphomelon Deans 13[489]DHJPAR0004949|Costa Rica|628[0n]|BOLD:AAA6775  
Alphomelon Deans 13[490]DHJPAR0005061|Costa Rica|650[0n]|BOLD:AAA6775  
Alphomelon Deans 13[491]DHJPAR0058160|Costa Rica|658[0n]|BOLD:AAA6775  
Alphomelon Deans 13[492]DHJPAR0048159|Costa Rica|658[0n]|BOLD:AAA6775  
Alphomelon Deans 13[493]DHJPAR0012707|Costa Rica|657[0n]|BOLD:AAA6775  
Alphomelon Deans 13[494]DHJPAR0057515|Costa Rica|658[0n]|BOLD:AAA6775  
Alphomelon Deans 13[495]DHJPAR0060156|Costa Rica|658[0n]|BOLD:AAA6775  
Alphomelon Deans 13[496]DHJPAR0002498|Costa Rica|657[0n]|BOLD:AAA6775  
Alphomelon Deans 13[497]DHJPAR0050981|Costa Rica|658[0n]|BOLD:AAA6775  
Alphomelon Deans 13[498]DHJPAR0061754|Costa Rica|658[0n]|BOLD:AAA6775  
Alphomelon Deans 13[499]DHJPAR0058205|Costa Rica|658[0n]|BOLD:AAA6775  
Alphomelon Deans 13[500]DHJPAR0062582|Costa Rica|658[0n]|BOLD:AAA6775  
Alphomelon Deans 13[501]DHJPAR0062590|Costa Rica|658[0n]|BOLD:AAA6775  
Alphomelon Deans 13[502]DHJPAR0062593|Costa Rica|658[0n]|BOLD:AAA6775  
Alphomelon Deans 13[503]DHJPAR0058867|Costa Rica|658[0n]|BOLD:AAA6775  
Alphomelon Deans 13[504]DHJPAR0025786|Costa Rica|655[0n]|BOLD:AAA6775  
Alphomelon Deans 13[505]DHJPAR0020596|Costa Rica|657[0n]|BOLD:AAA6775  
Alphomelon Deans 13[506]DHJPAR0004937|Costa Rica|657[0n]|BOLD:AAA6775  
Alphomelon Deans 13[507]DHJPAR0004969|Costa Rica|657[0n]|BOLD:AAA6775  
Alphomelon Deans 13[508]DHJPAR0004971|Costa Rica|657[0n]|BOLD:AAA6775  
Alphomelon Deans 13[509]DHJPAR0060613|Costa Rica|658[0n]|BOLD:AAA6775  
Alphomelon Deans 13[510]DHJPAR0005060|Costa Rica|657[0n]|BOLD:AAA6775  
Alphomelon Deans 13[511]DHJPAR0005114|Costa Rica|657[0n]|BOLD:AAA6775  
Alphomelon Deans 13[512]DHJPAR0054746|Costa Rica|658[0n]|BOLD:AAA6775  
Alphomelon Deans 13[513]DHJPAR0056706|Costa Rica|658[0n]|BOLD:AAA6775  
Alphomelon Deans 13[514]DHJPAR0061719|Costa Rica|658[0n]|BOLD:AAA6775  
Alphomelon Deans 13[515]DHJPAR0025617|Costa Rica|657[0n]|BOLD:AAA6775  
Alphomelon Deans 13[516]DHJPAR0053774|Costa Rica|658[0n]|BOLD:AAA6775  
Alphomelon Deans 13[517]DHJPAR0060621|Costa Rica|658[0n]|BOLD:AAA6775  
Alphomelon Deans 13[518]DHJPAR0060653|Costa Rica|658[0n]|BOLD:AAA6775  
Alphomelon Deans 13[519]DHJPAR0053717|Costa Rica|658[0n]|BOLD:AAA6775  
Alphomelon Deans 13[520]DHJPAR0056368|Costa Rica|661[0n]|BOLD:AAA6775  
Alphomelon Deans 13[521]DHJPAR0030714|Costa Rica|641[0n]|BOLD:AAA6775  
Alphomelon Deans 13[522]DHJPAR0002457|Costa Rica|657[0n]|BOLD:AAA6775  
Alphomelon Deans 13[523]DHJPAR0004657|Costa Rica|657[0n]|BOLD:AAA6775  
Alphomelon Deans 13[524]DHJPAR0004919|Costa Rica|657[0n]|BOLD:AAA6775  
Alphomelon Deans 13[525]DHJPAR0004894|Costa Rica|657[0n]|BOLD:AAA6775  
Alphomelon Deans 13[526]DHJPAR0012399|Costa Rica|657[0n]|BOLD:AAA6775  
Alphomelon Deans 13[527]DHJPAR0061661|Costa Rica|658[0n]|BOLD:AAA6775  
Alphomelon Deans 13[528]DHJPAR0020281|Costa Rica|657[0n]|BOLD:AAA6775  
Alphomelon Deans 13[529]DHJPAR0058938|Costa Rica|658[0n]|BOLD:AAA6775  
Alphomelon Deans 13[530]DHJPAR0058935|Costa Rica|658[0n]|BOLD:AAA6775  
Alphomelon Deans 13[531]DHJPAR0058921|Costa Rica|658[0n]|BOLD:AAA6775  
Alphomelon Deans 13[532]DHJPAR0058916|Costa Rica|658[0n]|BOLD:AAA6775  
Alphomelon Deans 13[533]DHJPAR0058893|Costa Rica|658[0n]|BOLD:AAA6775  
Alphomelon Deans 13[534]DHJPAR0058877|Costa Rica|658[0n]|BOLD:AAA6775  
Alphomelon Deans 13[535]DHJPAR0058847|Costa Rica|658[0n]|BOLD:AAA6775  
Alphomelon Deans 13[536]DHJPAR0056693|Costa Rica|658[0n]|BOLD:AAA6775  
Alphomelon Deans 13[537]DHJPAR0012855|Costa Rica|657[0n]|BOLD:AAA6775  
Alphomelon Deans 13[538]DHJPAR0046873|Costa Rica|658[0n]|BOLD:AAA6775  
Alphomelon Deans 13[539]DHJPAR0064082|Costa Rica|646[0n]|BOLD:AAA6775  
Alphomelon Deans 13[540]DHJPAR0026885|Costa Rica|597[0n]|BOLD:AAA6775  
Alphomelon Deans 13[541]DHJPAR0005113|Costa Rica|657[2n]|BOLD:AAA6775  
Alphomelon Deans 13[542]DHJPAR0025492|Costa Rica|657[0n]|BOLD:AAA6775  
Alphomelon Deans 13[543]DHJPAR0005115|Costa Rica|657[0n]|BOLD:AAA6775  
Alphomelon Deans 13[544]DHJPAR0004930|Costa Rica|657[0n]|BOLD:AAA6775  
Alphomelon Deans 13[545]DHJPAR0030830|Costa Rica|657[0n]|BOLD:AAA6775  
Alphomelon Deans 13[546]DHJPAR0030877|Costa Rica|657[0n]|BOLD:AAA6775  
Alphomelon Deans 13[547]DHJPAR0042917|Costa Rica|658[0n]|BOLD:AAA6775  
Alphomelon Deans 13[548]DHJPAR0002477|Costa Rica|657[2n]|BOLD:AAA6775  
Alphomelon Deans 13[549]DHJPAR0004884|Costa Rica|657[0n]|BOLD:AAA6775  
Alphomelon Deans 13[550]DHJPAR0020284|Costa Rica|657[0n]|BOLD:AAA6775  
Alphomelon Deans 13[551]DHJPAR0060183|Costa Rica|658[0n]|BOLD:AAA6775  
Alphomelon Deans 13[552]DHJPAR0060178|Costa Rica|658[0n]|BOLD:AAA6775  
Alphomelon Deans 13[553]DHJPAR0012874|Costa Rica|652[5n]|BOLD:AAA6775  
Alphomelon Deans 13[554]DHJPAR0002394|Costa Rica|657[0n]|BOLD:AAA6775  
Alphomelon Deans 13[555]DHJPAR0039875|Costa Rica|658[0n]|BOLD:AAA6775  
Alphomelon Deans 13[556]DHJPAR0063193|Costa Rica|658[0n]|BOLD:AAA6775  
Alphomelon Deans 13[557]DHJPAR0057761|Costa Rica|658[0n]|BOLD:AAA6775  
Alphomelon Deans 13[558]DHJPAR0025527|Costa Rica|657[0n]|BOLD:AAA6775  
Alphomelon Deans 13[559]DHJPAR0004912|Costa Rica|657[0n]|BOLD:AAA6775  
Alphomelon Deans 13[560]DHJPAR0012420|Costa Rica|657[0n]|BOLD:AAA6775  
Alphomelon Deans 13[561]DHJPAR0004642|Costa Rica|657[0n]|BOLD:AAA6775  
Alphomelon Deans 13[562]DHJPAR0002464|Costa Rica|657[0n]|BOLD:AAA6775  
Alphomelon Deans 13[563]DHJPAR0002475|Costa Rica|657[0n]|BOLD:AAA6775  
Alphomelon Deans 13[564]DHJPAR0002499|Costa Rica|657[0n]|BOLD:AAA6775  
Alphomelon Deans 13[565]DHJPAR0025376|Costa Rica|657[0n]|BOLD:AAA6775  
Alphomelon Deans 13[566]DHJPAR0062633|Costa Rica|658[0n]|BOLD:AAA6775  
Alphomelon Deans 13[567]DHJPAR0004970|Costa Rica|657[0n]|BOLD:AAA6775  
Alphomelon Deans 13[568]DHJPAR0005063|Costa Rica|657[0n]|BOLD:AAA6775  
Alphomelon Deans 13[569]DHJPAR0064063|Costa Rica|658[0n]|BOLD:AAA6775  
Alphomelon Deans 13[570]DHJPAR0002497|Costa Rica|657[0n]|BOLD:AAA6775  
Alphomelon Deans 13[571]DHJPAR0056740|Costa Rica|658[0n]|BOLD:AAA6775  
Alphomelon Deans 13[572]DHJPAR0050090|Costa Rica|658[0n]|BOLD:AAA6775  
Alphomelon Deans 13[573]DHJPAR0060610|Costa Rica|658[0n]|BOLD:AAA6775  
Alphomelon Deans 13[574]DHJPAR0011925|Costa Rica|657[1n]|BOLD:AAA6775  
Alphomelon Deans 13[575]DHJPAR0004887|Costa Rica|657[1n]|BOLD:AAA6775  
Alphomelon Deans 13[576]DHJPAR0004942|Costa Rica|657[1n]|BOLD:AAA6775  
Alphomelon Deans 13[577]DHJPAR0030769|Costa Rica|637[0n]|BOLD:AAA6775  
Alphomelon Deans 13[578]DHJPAR0030704|Costa Rica|636[0n]|BOLD:AAA6775  
Alphomelon Deans 13[579]DHJPAR0002484|Costa Rica|303[3n]  
Alphomelon Deans 13[580]DHJPAR0002393|Costa Rica|657[2n]|BOLD:AAA6775

Alphomelon Deans13[578]|DHJPAR00050|Costa Rica[656][On]|BOLD:AAA6775

Alphomelon Deans13[579]|DHJPAR0002484|Costa Rica[303][3n]

Alphomelon Deans13[580]|DHJPAR0002393|Costa Rica[657][2n]|BOLD:AAA6775

Alphomelon Deans13[581]|DHJPAR0025887|Costa Rica[657][1n]|BOLD:AAA6775

Alphomelon Deans13[582]|DHJPAR0006682|Costa Rica[658][On]|BOLD:AAA6775

Alphomelon nanosomal[583]|DHJPAR0005058|Costa Rica[627][7n]

Alphomelon nanosomal[584]|DHJPAR0004056|Costa Rica[627][2n]|BOLD: AAB9792

Alphomelon nanosomal[585]|DHJPAR0005054|Costa Rica[639][1n]|BOLD: AAB9792

Alphomelon nanosomal[586]|DHJPAR0030720|Costa Rica[655][On]|BOLD: AAB9792

Alphomelon nanosomal[587]|DHJPAR0005038|Costa Rica[657][On]|BOLD: AAB9792

Alphomelon nanosomal[588]|DHJPAR00054602|Costa Rica[658][On]|BOLD: AAB9792

Alphomelon nanosomal[589]|DHJPAR00061690|Costa Rica[657][On]|BOLD: AAB9792

Alphomelon nanosomal[590]|DHJPAR00060214|Costa Rica[658][On]|BOLD: AAB9792

Alphomelon nanosomal[591]|DHJPAR00059477|Costa Rica[658][On]|BOLD: AAB9792

Alphomelon nanosomal[592]|DHJPAR00054652|Costa Rica[658][On]|BOLD: AAB9792

Alphomelon nanosomal[593]|DHJPAR00035428|Costa Rica[658][On]|BOLD: AAB9792

Alphomelon nanosomal[594]|DHJPAR00060187|Costa Rica[658][On]|BOLD: AAB9792

Alphomelon nanosomal[595]|DHJPAR00035449|Costa Rica[658][On]|BOLD: AAB9792

Alphomelon nanosomal[596]|DHJPAR00035433|Costa Rica[658][On]|BOLD: AAB9792

Alphomelon nanosomal[597]|DHJPAR00058933|Costa Rica[658][On]|BOLD: AAB9792

Alphomelon nanosomal[598]|DHJPAR00060601|Costa Rica[658][On]|BOLD: AAB9792

Alphomelon nanosomal[599]|DHJPAR00060598|Costa Rica[658][On]|BOLD: AAB9792

Alphomelon nanosomal[600]|DHJPAR00049188|Costa Rica[658][On]|BOLD: AAB9792

Alphomelon nanosomal[601]|DHJPAR00058171|Costa Rica[658][On]|BOLD: AAB9792

Alphomelon nanosomal[602]|DHJPAR00060221|Costa Rica[658][On]|BOLD: AAB9792

Alphomelon nanosomal[603]|DHJPAR00053687|Costa Rica[658][On]|BOLD: AAB9792

Alphomelon nanosomal[604]|DHJPAR00059486|Costa Rica[658][On]|BOLD: AAB9792

Alphomelon nanosomal[605]|DHJPAR00051812|Costa Rica[661][On]|BOLD: AAB9792

Alphomelon nanosomal[606]|DHJPAR00038967|Costa Rica[658][On]|BOLD: AAB9792

Alphomelon nanosomal[607]|DHJPAR00058191|Costa Rica[658][On]|BOLD: AAB9792

Alphomelon nanosomal[608]|DHJPAR00058960|Costa Rica[661][On]|BOLD: AAB9792

Alphomelon nanosomal[609]|DHJPAR00054600|Costa Rica[658][On]|BOLD: AAB9792

Alphomelon nanosomal[610]|DHJPAR00034199|Costa Rica[655][On]|BOLD: AAB9792

Alphomelon nanosomal[611]|DHJPAR00049110|Costa Rica[657][On]|BOLD: AAB9792

Alphomelon nanosomal[612]|DHJPAR0012422|Costa Rica[657][On]|BOLD: AAB9792

Alphomelon nanosomal[613]|DHJPAR0012410|Costa Rica[657][On]|BOLD: AAB9792

Alphomelon nanosomal[614]|DHJPAR00020463|Costa Rica[657][On]|BOLD: AAB9792

Alphomelon nanosomal[615]|DHJPAR00020783|Costa Rica[657][On]|BOLD: AAB9792

Alphomelon nanosomal[616]|DHJPAR00058890|Costa Rica[658][On]|BOLD: AAB9792

Alphomelon nanosomal[617]|DHJPAR00047044|Costa Rica[661][On]|BOLD: AAB9792

Alphomelon nanosomal[618]|DHJPAR00058875|Costa Rica[658][On]|BOLD: AAB9792

Alphomelon nanosomal[619]|DHJPAR00060149|Costa Rica[658][On]|BOLD: AAB9792

Alphomelon nanosomal[620]|DHJPAR00058870|Costa Rica[658][On]|BOLD: AAB9792

Alphomelon nanosomal[621]|DHJPAR00060134|Costa Rica[658][On]|BOLD: AAB9792

Alphomelon nanosomal[622]|DHJPAR00058850|Costa Rica[658][On]|BOLD: AAB9792

Alphomelon nanosomal[623]|DHJPAR0012861|Costa Rica[657][On]|BOLD: AAB9792

Alphomelon nanosomal[624]|DHJPAR00060679|Costa Rica[658][On]|BOLD: AAB9792

Alphomelon talidicida[625]|DHJPAR00030709|Costa Rica[629][On]|BOLD: AAA7259

Alphomelon talidicida[626]|DHJPAR00048144|Costa Rica[658][On]|BOLD: AAA7259

Alphomelon talidicida[627]|DHJPAR00030698|Costa Rica[658][On]|BOLD: AAA7259

Alphomelon talidicida[628]|DHJPAR00056390|Costa Rica[661][On]|BOLD: AAA7259

Alphomelon talidicida[629]|DHJPAR0047253|Costa Rica[658][On]|BOLD: AAA7259

Alphomelon talidicida[630]|DHJPAR0002454|Costa Rica[558][14n]

Alphomelon talidicida[631]|DHJPAR0004973|Costa Rica[627][2n]|BOLD: AAA7259

Alphomelon talidicida[632]|DHJPAR0002453|Costa Rica[627][On]|BOLD: AAA7259

Alphomelon talidicida[633]|DHJPAR00060201|Costa Rica[658][On]|BOLD: AAA7259

Alphomelon talidicida[634]|DHJPAR0020287|Costa Rica[657][On]|BOLD: AAA7259

Alphomelon talidicida[635]|DHJPAR0012408|Costa Rica[657][On]|BOLD: AAA7259

Alphomelon talidicida[636]|DHJPAR0004886|Costa Rica[657][On]|BOLD: AAA7259

Alphomelon talidicida[637]|DHJPAR00063407|Costa Rica[658][On]|BOLD: AAA7259

Alphomelon talidicida[638]|DHJPAR0004655|Costa Rica[657][On]|BOLD: AAA7259

Alphomelon talidicida[639]|DHJPAR00050959|Costa Rica[658][On]|BOLD: AAA7259

Alphomelon talidicida[640]|DHJPAR00053777|Costa Rica[658][On]|BOLD: AAA7259

Alphomelon talidicida[641]|DHJPAR0004925|Costa Rica[657][On]|BOLD: AAA7259

Alphomelon talidicida[642]|DHJPAR0020282|Costa Rica[657][2n]|BOLD: AAA7259

Alphomelon talidicida[643]|DHJPAR00065240|Costa Rica[638][On]|BOLD: AAA7259

Alphomelon talidicida[644]|DHJPAR0002435|Costa Rica[656][On]|BOLD: AAA7259

Alphomelon talidicida[645]|DHJPAR0011854|Costa Rica[657][On]|BOLD: AAA7259

Alphomelon talidicida[646]|DHJPAR0011843|Costa Rica[657][On]|BOLD: AAA7259

Alphomelon talidicida[647]|DHJPAR0012856|Costa Rica[657][On]|BOLD: AAA7259

Alphomelon talidicida[648]|DHJPAR00060683|Costa Rica[658][On]|BOLD: AAA7259

Alphomelon talidicida[649]|DHJPAR00056698|Costa Rica[630][On]|BOLD: AAA7259

Alphomelon talidicida[650]|DHJPAR0002927|Costa Rica[627][On]|BOLD: AAA7259

Alphomelon talidicida[651]|DHJPAR0004962|Costa Rica[627][On]|BOLD: AAA7259

Alphomelon talidicida[652]|DHJPAR00038166|Costa Rica[658][On]|BOLD: AAA7259

Alphomelon talidicida[653]|DHJPAR00061723|Costa Rica[658][On]|BOLD: AAA7259

Alphomelon talidicida[654]|DHJPAR00060138|Costa Rica[658][On]|BOLD: AAA7259

Alphomelon talidicida[655]|DHJPAR00058892|Costa Rica[658][On]|BOLD: AAA7259

Alphomelon talidicida[656]|DHJPAR00047138|Costa Rica[658][On]|BOLD: AAA7259

Alphomelon talidicida[657]|DHJPAR00056694|Costa Rica[658][On]|BOLD: AAA7259

Alphomelon talidicida[658]|DHJPAR0004915|Costa Rica[657][On]|BOLD: AAA7259

Alphomelon talidicida[659]|DHJPAR00047254|Costa Rica[658][On]|BOLD: AAA7259

Alphomelon talidicida[660]|DHJPAR00047259|Costa Rica[658][On]|BOLD: AAA7259

Alphomelon talidicida[661]|DHJPAR0004666|Costa Rica[657][On]|BOLD: AAA7259

Alphomelon talidicida[662]|DHJPAR0004667|Costa Rica[657][On]|BOLD: AAA7259

Alphomelon talidicida[663]|DHJPAR0002442|Costa Rica[657][On]|BOLD: AAA7259

Alphomelon talidicida[664]|DHJPAR0002450|Costa Rica[657][On]|BOLD: AAA7259

Alphomelon talidicida[665]|DHJPAR00061684|Costa Rica[658][On]|BOLD: AAA7259

Alphomelon talidicida[666]|DHJPAR00061685|Costa Rica[658][On]|BOLD: AAA7259

Alphomelon talidicida[667]|DHJPAR00050979|Costa Rica[658][On]|BOLD: AAA7259

Alphomelon talidicida[668]|DHJPAR00056697|Costa Rica[658][On]|BOLD: AAA7259

Alphomelon talidicida[669]|DHJPAR00058206|Costa Rica[658][On]|BOLD: AAA7259

Alphomelon talidicida[670]|DHJPAR00061620|Costa Rica[658][On]|BOLD: AAA7259

Alphomelon talidicida[671]|DHJPAR00058224|Costa Rica[658][On]|BOLD: AAA7259

Alphomelon talidicida[672]|DHJPAR00061790|Costa Rica[658][On]|BOLD: AAA7259

Alphomelon talidicida[673]|DHJPAR00058864|Costa Rica[658][On]|BOLD: AAA7259

Alphomelon talidicida[674]|DHJPAR00041819|Costa Rica[658][On]|BOLD: AAA7259

Alphomelon talidicida[675]|DHJPAR0004941|Costa Rica[657][On]|BOLD: AAA7259

Alphomelon talidicida[676]|DHJPAR0004961|Costa Rica[657][On]|BOLD: AAA7259

Alphomelon talidicida[677]|DHJPAR0004967|Costa Rica[657][On]|BOLD: AAA7259



Alphomelon talidicida[[675]]DHJPAR0004941|Costa Rica|657[0n]]BOLD:AAA7259  
Alphomelon talidicida[[676]]DHJPAR0004961|Costa Rica|657[0n]]BOLD:AAA7259  
Alphomelon talidicida[[677]]DHJPAR0004967|Costa Rica|657[0n]]BOLD:AAA7259  
Alphomelon talidicida[[678]]DHJPAR0062733|Costa Rica|658[0n]]BOLD:AAA7259  
Alphomelon talidicida[[679]]DHJPAR0005046|Costa Rica|657[0n]]BOLD:AAA7259  
Alphomelon talidicida[[680]]DHJPAR0005062|Costa Rica|657[0n]]BOLD:AAA7259  
Alphomelon talidicida[[681]]DHJPAR0058910|Costa Rica|658[0n]]BOLD:AAA7259  
Alphomelon talidicida[[682]]DHJPAR0054700|Costa Rica|658[0n]]BOLD:AAA7259  
Alphomelon talidicida[[683]]DHJPAR0056704|Costa Rica|658[0n]]BOLD:AAA7259  
Alphomelon talidicida[[684]]DHJPAR0056551|Costa Rica|658[0n]]BOLD:AAA7259  
Alphomelon talidicida[[685]]DHJPAR0056780|Costa Rica|658[0n]]BOLD:AAA7259  
Alphomelon talidicida[[686]]DHJPAR0056730|Costa Rica|658[0n]]BOLD:AAA7259  
Alphomelon talidicida[[687]]DHJPAR0051199|Costa Rica|658[0n]]BOLD:AAA7259  
Alphomelon talidicida[[688]]DHJPAR0051203|Costa Rica|658[0n]]BOLD:AAA7259  
Alphomelon talidicida[[689]]DHJPAR0047139|Costa Rica|658[0n]]BOLD:AAA7259  
Alphomelon talidicida[[690]]DHJPAR0049216|Costa Rica|658[0n]]BOLD:AAA7259  
Alphomelon talidicida[[691]]DHJPAR0004932|Costa Rica|657[1n]]BOLD:AAA7259  
Alphomelon talidicida[[692]]DHJPAR0011857|Costa Rica|657[4n]]BOLD:AAA7259  
Alphomelon talidicida[[693]]DHJPAR0062109|Costa Rica|637[0n]]BOLD:AAA7259  
Alphomelon talidicida[[694]]DHJPAR0047255|Costa Rica|621[0n]]BOLD:AAA7259  
Alphomelon talidicida[[695]]DHJPAR0060131|Costa Rica|634[0n]]BOLD:AAA7259  
Alphomelon talidicida[[696]]DHJPAR0056679|Costa Rica|633[0n]]BOLD:AAA7259  
Alphomelon talidicida[[697]]DHJPAR0065190|Costa Rica|639[0n]]BOLD:AAA7259  
Alphomelon talidicida[[698]]DHJPAR0055247|Costa Rica|658[0n]]BOLD:AAA7259  
Alphomelon talidicida[[699]]DHJPAR0060687|Costa Rica|658[0n]]BOLD:AAA7259  
Alphomelon talidicida[[700]]DHJPAR0060676|Costa Rica|658[0n]]BOLD:AAA7259  
Alphomelon talidicida[[701]]DHJPAR0039876|Costa Rica|658[0n]]BOLD:AAA7259  
Alphomelon talidicida[[702]]DHJPAR0058876|Costa Rica|658[0n]]BOLD:AAA7259  
Alphomelon talidicida[[703]]DHJPAR0058887|Costa Rica|658[0n]]BOLD:AAA7259  
Alphomelon talidicida[[704]]DHJPAR0047131|Costa Rica|658[0n]]BOLD:AAA7259  
Alphomelon talidicida[[705]]DHJPAR0058973|Costa Rica|661[0n]]BOLD:AAA7259  
Alphomelon talidicida[[706]]DHJPAR0004889|Costa Rica|657[0n]]BOLD:AAA7259  
Alphomelon talidicida[[707]]DHJPAR0004909|Costa Rica|657[0n]]BOLD:AAA7259  
Alphomelon talidicida[[708]]DHJPAR0004921|Costa Rica|657[0n]]BOLD:AAA7259  
Alphomelon talidicida[[709]]DHJPAR0047256|Costa Rica|658[0n]]BOLD:AAA7259  
Alphomelon talidicida[[710]]DHJPAR0021271|Costa Rica|657[0n]]BOLD:AAA7259  
Alphomelon talidicida[[711]]DHJPAR0002463|Costa Rica|657[0n]]BOLD:AAA7259  
Alphomelon talidicida[[712]]DHJPAR0056879|Costa Rica|661[0n]]BOLD:AAA7259  
Alphomelon talidicida[[713]]DHJPAR0058181|Costa Rica|658[0n]]BOLD:AAA7259  
Alphomelon talidicida[[714]]DHJPAR0058859|Costa Rica|658[0n]]BOLD:AAA7259  
Alphomelon talidicida[[715]]DHJPAR0004938|Costa Rica|657[0n]]BOLD:AAA7259  
Alphomelon talidicida[[716]]DHJPAR0004963|Costa Rica|657[0n]]BOLD:AAA7259  
Alphomelon talidicida[[717]]DHJPAR0004965|Costa Rica|657[0n]]BOLD:AAA7259  
Alphomelon talidicida[[718]]DHJPAR0004968|Costa Rica|657[0n]]BOLD:AAA7259  
Alphomelon talidicida[[719]]DHJPAR0005025|Costa Rica|657[0n]]BOLD:AAA7259  
Alphomelon talidicida[[720]]DHJPAR0005065|Costa Rica|657[0n]]BOLD:AAA7259  
Alphomelon talidicida[[721]]DHJPAR0056506|Costa Rica|658[0n]]BOLD:AAA7259  
Alphomelon talidicida[[722]]DHJPAR0056512|Costa Rica|658[0n]]BOLD:AAA7259  
Alphomelon talidicida[[723]]DHJPAR0060622|Costa Rica|658[0n]]BOLD:AAA7259  
Alphomelon talidicida[[724]]DHJPAR0061724|Costa Rica|658[0n]]BOLD:AAA7259  
Alphomelon talidicida[[725]]DHJPAR0012711|Costa Rica|657[0n]]BOLD:AAA7259  
Alphomelon talidicida[[726]]DHJPAR0004922|Costa Rica|657[2n]]BOLD:AAA7259  
Alphomelon talidicida[[727]]DHJPAR0034269|Costa Rica|654[0n]]BOLD:AAA7259  
Alphomelon talidicida[[728]]DHJPAR0011863|Costa Rica|657[3n]]BOLD:AAA7259  
Alphomelon talidicida[[729]]DHJPAR0002500|Costa Rica|657[4n]]BOLD:AAA7259  
Alphomelon talidicida[[730]]DHJPAR0011861|Costa Rica|574[4n]]BOLD:AAA7259  
Alphomelon talidicida[[731]]DHJPAR0002486|Costa Rica|657[5n]]BOLD:AAA7259  
Alphomelon talidicida[[732]]DHJPAR0065237|Costa Rica|638[0n]]BOLD:AAA7259  
Alphomelon talidicida[[733]]DHJPAR0012875|Costa Rica|657[0n]]BOLD:AAA7259  
Alphomelon talidicida[[734]]DHJPAR0039873|Costa Rica|658[0n]]BOLD:AAA7259  
Alphomelon talidicida[[735]]DHJPAR0011860|Costa Rica|657[0n]]BOLD:AAA7259  
Alphomelon talidicida[[736]]DHJPAR0056685|Costa Rica|658[0n]]BOLD:AAA7259  
Alphomelon talidicida[[737]]DHJPAR0012853|Costa Rica|657[0n]]BOLD:AAA7259  
Alphomelon talidicida[[738]]DHJPAR0058971|Costa Rica|661[0n]]BOLD:AAA7259  
Alphomelon talidicida[[739]]DHJPAR0050091|Costa Rica|658[0n]]BOLD:AAA7259  
Alphomelon Deans31[[740]]DHJPAR0051293|Costa Rica|658[0n]]BOLD:ACB1223  
Alphomelon Deans31[[741]]DHJPAR00049074|Costa Rica|658[0n]]BOLD:ACB1223  
Alphomelon Deans32[[742]]DHJPAR0051292|Costa Rica|658[0n]]BOLD:ACJ4259  
Alphomelon Deans15[[743]]DHJPAR0005028|Costa Rica|657[0n]]BOLD:AAJ2171  
Alphomelon Deans15[[744]]DHJPAR0012125|Costa Rica|657[0n]]BOLD:AAJ2171  
Alphomelon Deans30[[745]]DHJPAR0056849|Costa Rica|657[0n]]BOLD:AAJ2207  
Alphomelon Deans30[[746]]DHJPAR0038181|Costa Rica|658[0n]]BOLD:AAJ2207  
Alphomelon Deans30[[747]]DHJPAR0030952|Costa Rica|657[0n]]BOLD:AAJ2207  
Alphomelon Deans30[[748]]DHJPAR0031005|Costa Rica|658[0n]]BOLD:AAJ2207  
Alphomelon Deans30[[749]]DHJPAR0060659|Costa Rica|658[0n]]BOLD:AAJ2207  
Alphomelon Deans30[[750]]DHJPAR0064167|Costa Rica|658[0n]]BOLD:AAJ2207  
Alphomelon Deans30[[751]]DHJPAR0030884|Costa Rica|360[0n]]BOLD:AAJ2207  
Alphomelon Deans30[[752]]DHJPAR0059774|Costa Rica|658[0n]]BOLD:AAJ2207  
Alphomelon Deans30[[753]]DHJPAR0059031|Costa Rica|660[2n]]BOLD:AAJ2207  
Alphomelon Deans30[[754]]DHJPAR0059030|Costa Rica|660[0n]]BOLD:AAJ2207  
Alphomelon Janzen22[[755]]DHJPAR0064007|Costa Rica|586[0n]]BOLD:ABX0806  
Alphomelon Janzen22[[756]]DHJPAR0046796|Costa Rica|658[0n]]BOLD:ABX0806  
Alphomelon Janzen22[[757]]DHJPAR0058263|Costa Rica|658[0n]]BOLD:ABX0806  
Alphomelon Janzen22[[758]]DHJPAR0049470|Costa Rica|658[0n]]BOLD:ABX0806  
Alphomelon Janzen22[[759]]DHJPAR0058256|Costa Rica|658[0n]]BOLD:ABX0806  
Alphomelon Janzen22[[760]]DHJPAR0051849|Costa Rica|658[1n]]BOLD:ABX0806  
Alphomelon Janzen22[[761]]DHJPAR0053843|Costa Rica|661[0n]]BOLD:ABX0806  
Alphomelon Janzen22[[762]]DHJPAR0053818|Costa Rica|658[0n]]BOLD:ABX0806  
Alphomelon Janzen22[[763]]DHJPAR0053809|Costa Rica|658[0n]]BOLD:ABX0806  
Alphomelon Deans24[[764]]DHJPAR0047257|Costa Rica|658[0n]]BOLD:AAR3562  
Alphomelon Deans24[[765]]DHJPAR0012413|Costa Rica|657[0n]]BOLD:AAR3562  
Alphomelon arecaphileDHJ01[[766]]DHJPAR0064074|Costa Rica|585[0n]]BOLD:AAB1086  
Alphomelon arecaphileDHJ01[[767]]DHJPAR0002473|Costa Rica|627[0n]]BOLD:AAB1086  
Alphomelon arecaphileDHJ01[[768]]DHJPAR0002474|Costa Rica|657[5n]]BOLD:AAB1086  
Alphomelon arecaphileDHJ01[[769]]DHJPAR0002447|Costa Rica|575[1n]]BOLD:AAB1086  
Alphomelon arecaphileDHJ01[[770]]DHJPAR0058974|Costa Rica|661[1n]]BOLD:AAB1086  
Alphomelon arecaphileDHJ01[[771]]DHJPAR0012858|Costa Rica|638[0n]]BOLD:AAB1086  
Alphomelon arecaphileDHJ01[[772]]DHJPAR0012424|Costa Rica|657[0n]]BOLD:AAB1086  
Alphomelon arecaphileDHJ01[[773]]DHJPAR0004671|Costa Rica|657[0n]]BOLD:AAB1086

Alphomelon arecaphileDHJ01[772]DHJPAR0012424Costa Rica[657[0n]]BOLD:AAB1086  
Alphomelon arecaphileDHJ01[773]DHJPAR0004671Costa Rica[657[0n]]BOLD:AAB1086  
Alphomelon arecaphileDHJ01[774]DHJPAR0006133Costa Rica[658[0n]]BOLD:AAB1086  
Alphomelon arecaphileDHJ01[775]DHJPAR0012124Costa Rica[657[0n]]BOLD:AAB1086  
Alphomelon arecaphileDHJ01[776]DHJPAR0050978Costa Rica[658[0n]]BOLD:AAB1086  
Alphomelon arecaphileDHJ01[777]DHJPAR0058852Costa Rica[658[0n]]BOLD:AAB1086  
Alphomelon arecaphileDHJ01[778]DHJPAR0005026Costa Rica[657[0n]]BOLD:AAB1086  
Alphomelon arecaphileDHJ01[779]DHJPAR0006151Costa Rica[658[0n]]BOLD:AAB1086  
Alphomelon arecaphileDHJ01[780]DHJPAR0004927Costa Rica[657[0n]]BOLD:AAB1086  
Alphomelon arecaphileDHJ01[781]DHJPAR0004934Costa Rica[657[0n]]BOLD:AAB1086  
Alphomelon arecaphileDHJ01[782]DHJPAR00060611Costa Rica[658[0n]]BOLD:AAB1086  
Alphomelon arecaphileDHJ01[783]DHJPAR0004903Costa Rica[657[0n]]BOLD:AAB1086  
Alphomelon arecaphileDHJ01[784]DHJPAR00060648Costa Rica[658[0n]]BOLD:AAB1086  
Alphomelon arecaphileDHJ01[785]DHJPAR0026445Costa Rica[657[0n]]BOLD:AAB1086  
Alphomelon arecaphileDHJ01[786]DHJPAR00060647Costa Rica[658[0n]]BOLD:AAB1086  
Alphomelon arecaphileDHJ01[787]DHJPAR0004923Costa Rica[657[4n]]BOLD:AAB1086  
Alphomelon arecaphileDHJ01[788]DHJPAR0004896Costa Rica[657[1n]]BOLD:AAB1086  
Alphomelon arecaphileDHJ01[789]DHJPAR00060129Costa Rica[658[0n]]BOLD:AAB1086  
Alphomelon arecaphileDHJ01[790]DHJPAR00060128Costa Rica[658[0n]]BOLD:AAB1086  
Alphomelon arecaphileDHJ01[791]DHJPAR0059479Costa Rica[658[0n]]BOLD:AAB1086  
Alphomelon arecaphileDHJ01[792]DHJPAR0012854Costa Rica[657[0n]]BOLD:AAB1086  
Alphomelon arecaphileDHJ01[793]DHJPAR0004881Costa Rica[657[1n]]BOLD:AAB1086  
Alphomelon arecaphileDHJ01[794]DHJPAR0005055Costa Rica[657[0n]]BOLD:AAB1086  
Alphomelon arecaphileDHJ01[795]DHJPAR0004945Costa Rica[657[2n]]BOLD:AAB1086  
Alphomelon arecaphileDHJ01[796]DHJPAR0004809Costa Rica[657[19n]]  
Alphomelon arecaphileDHJ01[797]DHJPAR0005032Costa Rica[657[0n]]BOLD:AAB1086  
Alphomelon arecaphileDHJ01[798]DHJPAR0047100Costa Rica[658[0n]]BOLD:AAB1086  
Alphomelon arecaphileDHJ01[799]DHJPAR0059489Costa Rica[658[0n]]BOLD:AAB1086  
Alphomelon arecaphileDHJ01[800]DHJPAR00047115Costa Rica[658[0n]]BOLD:AAB1086  
Alphomelon arecaphileDHJ01[801]DHJPAR0059469Costa Rica[658[0n]]BOLD:AAB1086  
Alphomelon arecaphileDHJ01[802]DHJPAR0005042Costa Rica[657[1n]]BOLD:AAB1086  
Alphomelon arecaphileDHJ01[803]DHJPAR0005023Costa Rica[657[1n]]BOLD:AAB1086  
Alphomelon arecaphileDHJ01[804]DHJPAR0056370Costa Rica[661[0n]]BOLD:AAB1086  
Alphomelon arecaphileDHJ01[805]BIOUG61902-F02Costa Rica[654[0n]]BOLD:AAB1086  
Alphomelon arecaphileDHJ01[806]DHJPAR0005051Costa Rica[657[1n]]BOLD:AAB1086  
Alphomelon arecaphileDHJ01[807]DHJPAR0005030Costa Rica[556[0n]]BOLD:AAB1086  
Alphomelon arecaphileDHJ01[808]DHJPAR0012709Costa Rica[657[0n]]BOLD:AAB1086  
Alphomelon arecaphileDHJ01[809]DHJPAR0002448Costa Rica[657[0n]]BOLD:AAB1086  
Alphomelon arecaphileDHJ01[810]DHJPAR00053712Costa Rica[658[0n]]BOLD:AAB1086  
Alphomelon arecaphileDHJ01[811]DHJPAR00020782Costa Rica[657[0n]]BOLD:AAB1086  
Alphomelon arecaphileDHJ01[812]DHJPAR0004901Costa Rica[657[0n]]BOLD:AAB1086  
Alphomelon arecaphileDHJ01[813]DHJPAR0004895Costa Rica[657[0n]]BOLD:AAB1086  
Alphomelon arecaphileDHJ01[814]DHJPAR0012402Costa Rica[657[0n]]BOLD:AAB1086  
Alphomelon arecaphileDHJ01[815]DHJPAR0011848Costa Rica[657[0n]]BOLD:AAB1086  
Alphomelon arecaphileDHJ01[816]DHJPAR00065170Costa Rica[638[0n]]BOLD:AAB1086  
Alphomelon arecaphileDHJ02[817]DHJPAR0058986Costa Rica[661[0n]]BOLD:AAB0787  
Alphomelon arecaphileDHJ02[818]DHJPAR0058953Costa Rica[660[0n]]BOLD:AAB0787  
Alphomelon arecaphileDHJ02[819]DHJPAR00053105Costa Rica[657[0n]]BOLD:AAB0787  
Alphomelon arecaphileDHJ02[820]DHJPAR00054626Costa Rica[658[0n]]BOLD:AAB0787  
Alphomelon arecaphileDHJ02[821]DHJPAR00038970Costa Rica[658[0n]]BOLD:AAB0787  
Alphomelon arecaphileDHJ02[822]DHJPAR00047129Costa Rica[658[0n]]BOLD:AAB0787  
Alphomelon arecaphileDHJ02[823]DHJPAR00052972Costa Rica[658[0n]]BOLD:AAB0787  
Alphomelon arecaphileDHJ02[824]DHJPAR00058917Costa Rica[610[0n]]BOLD:AAB0787  
Alphomelon arecaphileDHJ02[825]DHJPAR00031104Costa Rica[617[0n]]BOLD:AAB0787  
Alphomelon arecaphileDHJ02[826]DHJPAR00034224Costa Rica[630[1n]]BOLD:AAB0787  
Alphomelon arecaphileDHJ02[827]DHJPAR0012394Costa Rica[618[0n]]BOLD:AAB0787  
Alphomelon arecaphileDHJ02[828]DHJPAR00039872Costa Rica[627[0n]]BOLD:AAB0787  
Alphomelon arecaphileDHJ02[829]DHJPAR0002476Costa Rica[627[0n]]BOLD:AAB0787  
Alphomelon arecaphileDHJ02[830]DHJPAR00020917Costa Rica[633[0n]]BOLD:AAB0787  
Alphomelon arecaphileDHJ02[831]DHJPAR00034203Costa Rica[658[0n]]BOLD:AAB0787  
Alphomelon arecaphileDHJ02[832]DHJPAR00060177Costa Rica[658[0n]]BOLD:AAB0787  
Alphomelon arecaphileDHJ02[833]DHJPAR00058956Costa Rica[660[0n]]BOLD:AAB0787  
Alphomelon arecaphileDHJ02[834]DHJPAR0004920Costa Rica[657[0n]]BOLD:AAB0787  
Alphomelon arecaphileDHJ02[835]DHJPAR0004928Costa Rica[657[0n]]BOLD:AAB0787  
Alphomelon arecaphileDHJ02[836]DHJPAR0012409Costa Rica[657[0n]]BOLD:AAB0787  
Alphomelon arecaphileDHJ02[837]DHJPAR0004914Costa Rica[657[0n]]BOLD:AAB0787  
Alphomelon arecaphileDHJ02[838]DHJPAR00062588Costa Rica[658[0n]]BOLD:AAB0787  
Alphomelon arecaphileDHJ02[839]DHJPAR0004653Costa Rica[657[0n]]BOLD:AAB0787  
Alphomelon arecaphileDHJ02[840]DHJPAR0002485Costa Rica[657[0n]]BOLD:AAB0787  
Alphomelon arecaphileDHJ02[841]DHJPAR00060239Costa Rica[658[0n]]BOLD:AAB0787  
Alphomelon arecaphileDHJ02[842]DHJPAR00062584Costa Rica[658[0n]]BOLD:AAB0787  
Alphomelon arecaphileDHJ02[843]DHJPAR0005034Costa Rica[657[0n]]BOLD:AAB0787  
Alphomelon arecaphileDHJ02[844]DHJPAR00058972Costa Rica[660[0n]]BOLD:AAB0787  
Alphomelon arecaphileDHJ02[845]DHJPAR00059478Costa Rica[658[0n]]BOLD:AAB0787  
Alphomelon arecaphileDHJ02[846]DHJPAR0012696Costa Rica[657[0n]]BOLD:AAB0787  
Alphomelon arecaphileDHJ02[847]DHJPAR0012879Costa Rica[657[2n]]BOLD:AAB0787  
Alphomelon arecaphileDHJ02[848]DHJPAR00030711Costa Rica[636[0n]]BOLD:AAB0787  
Alphomelon arecaphileDHJ02[849]DHJPAR00034208Costa Rica[621[0n]]BOLD:AAB0787  
Alphomelon arecaphileDHJ02[850]DHJPAR00030718Costa Rica[573[0n]]BOLD:AAB0787  
Alphomelon arecaphileDHJ02[851]DHJPAR00041792Costa Rica[566[0n]]BOLD:AAB0787  
Alphomelon arecaphileDHJ02[852]DHJPAR00058218Costa Rica[626[0n]]BOLD:AAB0787  
Alphomelon arecaphileDHJ02[853]DHJPAR00060185Costa Rica[634[0n]]BOLD:AAB0787  
Alphomelon arecaphileDHJ02[854]DHJPAR0004669Costa Rica[655[0n]]BOLD:AAB0787  
Alphomelon arecaphileDHJ02[855]DHJPAR0004947Costa Rica[656[3n]]BOLD:AAB0787  
Alphomelon arecaphileDHJ02[856]DHJPAR0011844Costa Rica[656[1n]]BOLD:AAB0787  
Alphomelon arecaphileDHJ02[857]DHJPAR00038131Costa Rica[658[0n]]BOLD:AAB0787  
Alphomelon arecaphileDHJ02[858]DHJPAR00038130Costa Rica[658[0n]]BOLD:AAB0787  
Alphomelon arecaphileDHJ02[859]DHJPAR00038135Costa Rica[658[0n]]BOLD:AAB0787  
Alphomelon arecaphileDHJ02[860]DHJPAR0012870Costa Rica[657[0n]]BOLD:AAB0787  
Alphomelon arecaphileDHJ02[861]DHJPAR0012873Costa Rica[657[0n]]BOLD:AAB0787  
Alphomelon arecaphileDHJ02[862]DHJPAR00057779Costa Rica[661[0n]]BOLD:AAB0787  
Alphomelon arecaphileDHJ02[863]DHJPAR00058840Costa Rica[658[0n]]BOLD:AAB0787  
Alphomelon arecaphileDHJ02[864]DHJPAR00058843Costa Rica[658[0n]]BOLD:AAB0787  
Alphomelon arecaphileDHJ02[865]DHJPAR00058939Costa Rica[658[0n]]BOLD:AAB0787  
Alphomelon arecaphileDHJ02[866]DHJPAR00058942Costa Rica[658[0n]]BOLD:AAB0787  
Alphomelon arecaphileDHJ02[867]DHJPAR00058948Costa Rica[657[0n]]BOLD:AAB0787  
Alphomelon arecaphileDHJ02[868]DHJPAR00060234Costa Rica[658[0n]]BOLD:AAB0787  
Alphomelon arecaphileDHJ02[869]DHJPAR00058981Costa Rica[661[0n]]BOLD:AAB0787  
Alphomelon arecaphileDHJ02[870]DHJPAR00058982Costa Rica[661[0n]]BOLD:AAB0787

Alphomelon arecaphileDHJ02[868]DHJPAR0060234Costa Rica[658[0n]]BOLD: AAB0787  
 Alphomelon arecaphileDHJ02[869]DHJPAR0058981Costa Rica[661[0n]]BOLD: AAB0787  
 Alphomelon arecaphileDHJ02[870]DHJPAR0058982Costa Rica[661[0n]]BOLD: AAB0787  
 Alphomelon arecaphileDHJ02[871]DHJPAR0051778Costa Rica[660[0n]]BOLD: AAB0787  
 Alphomelon arecaphileDHJ02[872]DHJPAR0004907Costa Rica[657[0n]]BOLD: AAB0787  
 Alphomelon arecaphileDHJ02[873]DHJPAR0058957Costa Rica[661[0n]]BOLD: AAB0787  
 Alphomelon arecaphileDHJ02[874]DHJPAR0058195Costa Rica[658[0n]]BOLD: AAB0787  
 Alphomelon arecaphileDHJ02[875]DHJPAR0005020Costa Rica[657[0n]]BOLD: AAB0787  
 Alphomelon arecaphileDHJ02[876]DHJPAR0039878Costa Rica[658[0n]]BOLD: AAB0787  
 Alphomelon arecaphileDHJ02[877]DHJPAR0041775Costa Rica[658[0n]]BOLD: AAB0787  
 Alphomelon arecaphileDHJ02[878]DHJPAR0041794Costa Rica[658[0n]]BOLD: AAB0787  
 Alphomelon arecaphileDHJ02[879]DHJPAR0004926Costa Rica[657[0n]]BOLD: AAB0787  
 Alphomelon arecaphileDHJ02[880]DHJPAR0058895Costa Rica[658[0n]]BOLD: AAB0787  
 Alphomelon arecaphileDHJ02[881]DHJPAR0051032Costa Rica[657[0n]]BOLD: AAB0787  
 Alphomelon arecaphileDHJ02[882]DHJPAR0051038Costa Rica[658[0n]]BOLD: AAB0787  
 Alphomelon arecaphileDHJ02[883]DHJPAR0012705Costa Rica[657[0n]]BOLD: AAB0787  
 Alphomelon arecaphileDHJ02[884]DHJPAR0020200Costa Rica[657[1n]]BOLD: AAB0787  
 Alphomelon arecaphileDHJ02[885]DHJPAR0005066Costa Rica[656[0n]]BOLD: AAB0787  
 Alphomelon arecaphileDHJ02[886]DHJPAR0005018Costa Rica[656[0n]]BOLD: AAB0787  
 Alphomelon arecaphileDHJ02[887]DHJPAR0004916Costa Rica[656[0n]]BOLD: AAB0787  
 Alphomelon arecaphileDHJ02[888]DHJPAR0004911Costa Rica[656[0n]]BOLD: AAB0787  
 Alphomelon arecaphileDHJ02[889]DHJPAR0004883Costa Rica[656[0n]]BOLD: AAB0787  
 Alphomelon arecaphileDHJ02[890]DHJPAR0055257Costa Rica[657[0n]]BOLD: AAB0787

Alphomelon melanoscelis[891]DHJPAR0051219Costa Rica[618[1n]]BOLD: AAB6733  
 Alphomelon melanoscelis[892]DHJPAR0004904Costa Rica[627[0n]]BOLD: AAB6733  
 Alphomelon melanoscelis[893]DHJPAR0057763Costa Rica[623[0n]]BOLD: AAB6733  
 Alphomelon melanoscelis[894]DHJPAR0004890Costa Rica[623[0n]]BOLD: AAB6733  
 Alphomelon melanoscelis[895]DHJPAR0002452Costa Rica[419[0n]]BOLD: AAB6733  
 Alphomelon melanoscelis[896]DHJPAR0060618Costa Rica[658[0n]]BOLD: AAB6733  
 Alphomelon melanoscelis[897]DHJPAR0034243Costa Rica[658[0n]]BOLD: AAB6733  
 Alphomelon melanoscelis[898]DHJPAR0055274Costa Rica[658[0n]]BOLD: AAB6733  
 Alphomelon melanoscelis[899]DHJPAR0002395Costa Rica[657[0n]]BOLD: AAB6733  
 Alphomelon melanoscelis[900]DHJPAR0058834Costa Rica[658[0n]]BOLD: AAB6733  
 Alphomelon melanoscelis[901]DHJPAR0058841Costa Rica[658[0n]]BOLD: AAB6733  
 Alphomelon melanoscelis[902]DHJPAR0058842Costa Rica[658[0n]]BOLD: AAB6733  
 Alphomelon melanoscelis[903]DHJPAR0058844Costa Rica[658[0n]]BOLD: AAB6733  
 Alphomelon melanoscelis[904]DHJPAR0058848Costa Rica[658[0n]]BOLD: AAB6733  
 Alphomelon melanoscelis[905]DHJPAR0058866Costa Rica[658[0n]]BOLD: AAB6733  
 Alphomelon melanoscelis[906]DHJPAR0058888Costa Rica[658[0n]]BOLD: AAB6733  
 Alphomelon melanoscelis[907]DHJPAR0060625Costa Rica[658[0n]]BOLD: AAB6733  
 Alphomelon melanoscelis[908]DHJPAR0058941Costa Rica[658[0n]]BOLD: AAB6733  
 Alphomelon melanoscelis[909]DHJPAR0058946Costa Rica[658[0n]]BOLD: AAB6733  
 Alphomelon melanoscelis[910]DHJPAR0058954Costa Rica[661[0n]]BOLD: AAB6733  
 Alphomelon melanoscelis[911]DHJPAR0058964Costa Rica[661[0n]]BOLD: AAB6733  
 Alphomelon melanoscelis[912]DHJPAR0058980Costa Rica[661[0n]]BOLD: AAB6733  
 Alphomelon melanoscelis[913]DHJPAR0058983Costa Rica[661[0n]]BOLD: AAB6733  
 Alphomelon melanoscelis[914]DHJPAR0004899Costa Rica[657[0n]]BOLD: AAB6733  
 Alphomelon melanoscelis[915]DHJPAR0004908Costa Rica[657[0n]]BOLD: AAB6733  
 Alphomelon melanoscelis[916]DHJPAR0004913Costa Rica[657[0n]]BOLD: AAB6733  
 Alphomelon melanoscelis[917]DHJPAR0004918Costa Rica[657[0n]]BOLD: AAB6733  
 Alphomelon melanoscelis[918]DHJPAR0012412Costa Rica[657[0n]]BOLD: AAB6733  
 Alphomelon melanoscelis[919]DHJPAR0012419Costa Rica[657[0n]]BOLD: AAB6733  
 Alphomelon melanoscelis[920]DHJPAR0012425Costa Rica[657[0n]]BOLD: AAB6733  
 Alphomelon melanoscelis[921]DHJPAR0060630Costa Rica[658[0n]]BOLD: AAB6733  
 Alphomelon melanoscelis[922]DHJPAR0020291Costa Rica[657[0n]]BOLD: AAB6733  
 Alphomelon melanoscelis[923]DHJPAR0061666Costa Rica[658[0n]]BOLD: AAB6733  
 Alphomelon melanoscelis[924]DHJPAR0058177Costa Rica[658[0n]]BOLD: AAB6733  
 Alphomelon melanoscelis[925]DHJPAR0058156Costa Rica[658[0n]]BOLD: AAB6733  
 Alphomelon melanoscelis[926]DHJPAR0060232Costa Rica[658[0n]]BOLD: AAB6733  
 Alphomelon melanoscelis[927]DHJPAR0057502Costa Rica[658[0n]]BOLD: AAB6733  
 Alphomelon melanoscelis[928]DHJPAR0041766Costa Rica[658[0n]]BOLD: AAB6733  
 Alphomelon melanoscelis[929]DHJPAR0057514Costa Rica[658[0n]]BOLD: AAB6733  
 Alphomelon melanoscelis[930]DHJPAR0041692Costa Rica[658[0n]]BOLD: AAB6733  
 Alphomelon melanoscelis[931]DHJPAR0058213Costa Rica[658[0n]]BOLD: AAB6733  
 Alphomelon melanoscelis[932]DHJPAR0041714Costa Rica[658[0n]]BOLD: AAB6733  
 Alphomelon melanoscelis[933]DHJPAR0041739Costa Rica[658[0n]]BOLD: AAB6733  
 Alphomelon melanoscelis[934]DHJPAR0058851Costa Rica[658[0n]]BOLD: AAB6733  
 Alphomelon melanoscelis[935]DHJPAR0041756Costa Rica[658[0n]]BOLD: AAB6733  
 Alphomelon melanoscelis[936]DHJPAR0058861Costa Rica[658[0n]]BOLD: AAB6733  
 Alphomelon melanoscelis[937]DHJPAR0061623Costa Rica[658[0n]]BOLD: AAB6733  
 Alphomelon melanoscelis[938]DHJPAR0058168Costa Rica[658[0n]]BOLD: AAB6733  
 Alphomelon melanoscelis[939]DHJPAR0058219Costa Rica[658[0n]]BOLD: AAB6733  
 Alphomelon melanoscelis[940]DHJPAR0060617Costa Rica[658[0n]]BOLD: AAB6733  
 Alphomelon melanoscelis[941]DHJPAR0059480Costa Rica[658[0n]]BOLD: AAB6733  
 Alphomelon melanoscelis[942]DHJPAR0058936Costa Rica[658[0n]]BOLD: AAB6733  
 Alphomelon melanoscelis[943]DHJPAR0061628Costa Rica[658[0n]]BOLD: AAB6733  
 Alphomelon melanoscelis[944]DHJPAR0055445Costa Rica[658[0n]]BOLD: AAB6733  
 Alphomelon melanoscelis[945]DHJPAR0057770Costa Rica[658[0n]]BOLD: AAB6733  
 Alphomelon melanoscelis[946]DHJPAR0012404Costa Rica[657[0n]]BOLD: AAB6733  
 Alphomelon melanoscelis[947]DHJPAR0020288Costa Rica[657[1n]]BOLD: AAB6733  
 Alphomelon melanoscelis[948]DHJPAR0012872Costa Rica[656[2n]]BOLD: AAB6733  
 Alphomelon melanoscelis[949]DHJPAR0004929Costa Rica[657[1n]]BOLD: AAB6733  
 Alphomelon melanoscelis[950]DHJPAR0034227Costa Rica[612[0n]]BOLD: AAB6733  
 Alphomelon melanoscelis[951]DHJPAR0005035Costa Rica[656[2n]]BOLD: AAB6733  
 Alphomelon melanoscelis[952]DHJPAR0034230Costa Rica[651[0n]]BOLD: AAB6733

Alphomelon citroloma[953]BIOUG92282-B07Costa Rica[656[0n]]BOLD: AEN2538  
 Hymenoptera[954]BIOUG92355-E04Costa Rica[696[0n]]  
 Alphomelon citroloma[955]BIOUG94211-E06Costa Rica[654[0n]]BOLD: AEN2538  
 Alphomelon citroloma[956]BIOUG92281-F02Costa Rica[656[0n]]BOLD: AEN2538  
 Hymenoptera[957]BIOUG96059-B09Costa Rica[652[0n]]BOLD: AEN2538  
 Hymenoptera[958]BIOUG92367-F10Costa Rica[654[0n]]BOLD: AEN2538  
 Alphomelon citroloma[959]BIOUG95212-F10Costa Rica[653[0n]]BOLD: AEN2538  
 Alphomelon Deans29[960]DHJPAR0039480Costa Rica[658[0n]]BOLD: AAB8584  
 Alphomelon Deans29[961]DHJPAR0027684Costa Rica[627[0n]]BOLD: AAB8584  
 Alphomelon Deans29[962]DHJPAR0060266Costa Rica[658[0n]]BOLD: AAB8584  
 Alphomelon Deans29[963]DHJPAR0002459Costa Rica[657[0n]]BOLD: AAB8584  
 Alphomelon Deans29[964]DHJPAR0027666Costa Rica[627[0n]]BOLD: AAB8584  
 Alphomelon Deans29[965]DHJPAR0013793Costa Rica[600[0n]]BOLD: AAB8584  
 Alphomelon Deans29[966]DHJPAR0013794Costa Rica[596[0n]]BOLD: AAB8584  
 Alphomelon Deans29[967]DHJPAR0042479Costa Rica[658[0n]]BOLD: AAB8584

Alphomelon Deans29[965]DHJPAR0013793|Costa Rica|600[0n]|BOLD:AAB8584  
Alphomelon Deans29[966]DHJPAR0013794|Costa Rica|596[0n]|BOLD:AAB8584  
Alphomelon Deans29[967]DHJPAR0042479|Costa Rica|658[0n]|BOLD:AAB8584  
Alphomelon Deans29[968]DHJPAR0042047|Costa Rica|658[0n]|BOLD:AAB8584  
Alphomelon Deans29[969]DHJPAR0043086|Costa Rica|658[0n]|BOLD:AAB8584  
Alphomelon Deans29[970]DHJPAR0042480|Costa Rica|658[0n]|BOLD:AAB8584  
Alphomelon Deans29[971]DHJPAR0059051|Costa Rica|658[0n]|BOLD:AAB8584  
Alphomelon melanoscelsis[972]WMIC 0349|Venezuela|658[0n]|BOLD:AAB8584  
Alphomelon Deans29[973]DHJPAR0026277|Costa Rica|657[0n]|BOLD:AAB8584  
Alphomelon Deans29[974]BIOUG17714-A08|Costa Rica|543[2n]|BOLD:AAB8584  
Alphomelon Deans29[975]DHJPAR0004234|Costa Rica|657[0n]|BOLD:AAB8584  
Alphomelon Deans29[976]DHJPAR0049083|Costa Rica|658[0n]|BOLD:AAB8584  
Alphomelon Deans29[977]DHJPAR0049027|Costa Rica|658[0n]|BOLD:AAB8584  
Alphomelon Deans29[978]DHJPAR0049933|Costa Rica|658[0n]|BOLD:AAB8584  
Alphomelon Deans29[979]DHJPAR0002479|Costa Rica|657[0n]|BOLD:AAB8584  
Alphomelon Deans29[980]DHJPAR0002468|Costa Rica|657[1n]|BOLD:AAB8584  
Alphomelon Deans29[981]DHJPAR0004803|Costa Rica|657[1n]|BOLD:AAB8584  
Alphomelon Deans29[982]DHJPAR0049033|Costa Rica|633[0n]|BOLD:AAB8584  
Alphomelon melanoscelsis[983]07TAPACH-01773|Mexico|658[0n]|BOLD:AAB8584  
Alphomelon Deans29[984]DHJPAR0004806|Costa Rica|637[1n]|BOLD:AAB8584  
Alphomelon Deans29[985]DHJPAR0002472|Costa Rica|657[1n]|BOLD:AAB8584  
Alphomelon Deans29[986]DHJPAR0005040|Costa Rica|657[0n]|BOLD:AAB8584  
Alphomelon Deans29[987]DHJPAR0049249|Costa Rica|658[0n]|BOLD:AAB8584  
Alphomelon Deans29[988]DHJPAR0002480|Costa Rica|657[1n]|BOLD:AAB8584  
Alphomelon Deans29[989]DHJPAR0012871|Costa Rica|657[4n]|BOLD:AAB8584  
Alphomelon Deans29[990]DHJPAR0012878|Costa Rica|656[0n]|BOLD:AAB8584  
Alphomelon Deans29[991]DHJPAR0047176|Costa Rica|658[0n]|BOLD:AAB8584  
Alphomelon Deans29[992]DHJPAR0026274|Costa Rica|624[0n]|BOLD:AAB8584  
Alphomelon Deans29[993]DHJPAR0058276|Costa Rica|658[0n]|BOLD:AAB8584  
Alphomelon Deans29[994]DHJPAR0058243|Costa Rica|658[0n]|BOLD:AAB8584  
Alphomelon Deans29[995]DHJPAR0056870|Costa Rica|661[0n]|BOLD:AAB8584  
Alphomelon melanoscelsis[996]CNCHYM 00037|Honduras|573[0n]|BOLD:AAB8584  
Alphomelon Deans29[997]DHJPAR0042413|Costa Rica|641[0n]|BOLD:AAB8584  
Alphomelon Deans29[998]DHJPAR0041966|Costa Rica|614[0n]|BOLD:AAB8584  
Alphomelon Deans29[999]DHJPAR0059053|Costa Rica|658[0n]|BOLD:AAB8584  
Alphomelon Deans29[1000]DHJPAR0045334|Costa Rica|658[0n]|BOLD:AAB8584  
Alphomelon Deans29[1001]DHJPAR0057803|Costa Rica|661[0n]|BOLD:AAB8584  
Alphomelon Deans29[1002]DHJPAR0059033|Costa Rica|661[0n]|BOLD:AAB8584  
Alphomelon Deans29[1003]DHJPAR0059029|Costa Rica|661[0n]|BOLD:AAB8584  
Alphomelon Deans29[1004]DHJPAR0059023|Costa Rica|661[0n]|BOLD:AAB8584  
Alphomelon Deans29[1005]DHJPAR0060263|Costa Rica|658[0n]|BOLD:AAB8584  
Alphomelon Deans29[1006]DHJPAR0058839|Costa Rica|658[0n]|BOLD:AAB8584  
Alphomelon Deans29[1007]DHJPAR0057532|Costa Rica|658[0n]|BOLD:AAB8584  
Alphomelon Deans29[1008]DHJPAR0059061|Costa Rica|658[0n]|BOLD:AAB8584  
Alphomelon Deans29[1009]DHJPAR0059068|Costa Rica|658[0n]|BOLD:AAB8584  
Alphomelon Deans29[1010]DHJPAR0059041|Costa Rica|661[0n]|BOLD:AAB8584  
Alphomelon Deans29[1011]DHJPAR0059028|Costa Rica|661[0n]|BOLD:AAB8584  
Alphomelon Deans29[1012]DHJPAR0058994|Costa Rica|661[0n]|BOLD:AAB8584  
Alphomelon Deans29[1013]DHJPAR0042455|Costa Rica|658[0n]|BOLD:AAB8584  
Alphomelon Deans29[1014]DHJPAR0042542|Costa Rica|623[0n]|BOLD:AAB8584  
Alphomelon Deans29[1015]DHJPAR0041851|Costa Rica|658[1n]|BOLD:AAB8584  
Alphomelon Deans29[1016]DHJPAR0056871|Costa Rica|661[0n]|BOLD:AAB8584  
Alphomelon Deans29[1017]DHJPAR0042485|Costa Rica|624[0n]|BOLD:AAB8584  
Alphomelon Deans29[1018]DHJPAR0047235|Costa Rica|635[0n]|BOLD:AAB8584  
Alphomelon Deans29[1019]DHJPAR0060260|Costa Rica|633[0n]|BOLD:AAB8584  
Alphomelon Deans29[1020]DHJPAR0042453|Costa Rica|643[0n]|BOLD:AAB8584  
Alphomelon Deans29[1021]DHJPAR0049464|Costa Rica|658[0n]|BOLD:AAB8584  
Alphomelon Deans29[1022]DHJPAR0056030|Costa Rica|670[0n]|BOLD:AAB8584  
Alphomelon Deans29[1023]DHJPAR0042881|Costa Rica|658[0n]|BOLD:AAB8584  
Alphomelon Deans29[1024]DHJPAR0059064|Costa Rica|658[0n]|BOLD:AAB8584  
Alphomelon Deans29[1025]DHJPAR0059062|Costa Rica|658[0n]|BOLD:AAB8584  
Alphomelon Deans29[1026]DHJPAR0059080|Costa Rica|658[0n]|BOLD:AAB8584  
Alphomelon Deans29[1027]DHJPAR0059069|Costa Rica|658[0n]|BOLD:AAB8584  
Alphomelon Deans29[1028]DHJPAR0055325|Costa Rica|658[0n]|BOLD:AAB8584  
Alphomelon Deans29[1029]DHJPAR0058261|Costa Rica|658[0n]|BOLD:AAB8584  
Alphomelon Deans29[1030]DHJPAR0042411|Costa Rica|658[0n]|BOLD:AAB8584  
Alphomelon Deans29[1031]DHJPAR0058282|Costa Rica|658[0n]|BOLD:AAB8584  
Alphomelon Deans29[1032]DHJPAR0055293|Costa Rica|658[0n]|BOLD:AAB8584  
Alphomelon Deans29[1033]DHJPAR0042462|Costa Rica|658[0n]|BOLD:AAB8584  
Alphomelon Deans29[1034]DHJPAR0042458|Costa Rica|658[0n]|BOLD:AAB8584  
Alphomelon Deans29[1035]DHJPAR0042451|Costa Rica|658[0n]|BOLD:AAB8584  
Alphomelon Deans29[1036]DHJPAR0042442|Costa Rica|658[0n]|BOLD:AAB8584  
Alphomelon Deans29[1037]DHJPAR0042439|Costa Rica|658[0n]|BOLD:AAB8584  
Alphomelon Deans29[1038]DHJPAR0042450|Costa Rica|658[0n]|BOLD:AAB8584  
Alphomelon Deans29[1039]DHJPAR0042449|Costa Rica|658[0n]|BOLD:AAB8584  
Alphomelon Deans29[1040]DHJPAR0060261|Costa Rica|658[0n]|BOLD:AAB8584  
Alphomelon Deans29[1041]DHJPAR0042495|Costa Rica|658[0n]|BOLD:AAB8584  
Alphomelon Deans29[1042]DHJPAR0060272|Costa Rica|658[0n]|BOLD:AAB8584  
Alphomelon Deans29[1043]DHJPAR0060262|Costa Rica|658[0n]|BOLD:AAB8584  
Alphomelon Deans29[1044]DHJPAR0047185|Costa Rica|658[0n]|BOLD:AAB8584  
Alphomelon Deans29[1045]DHJPAR0058998|Costa Rica|661[0n]|BOLD:AAB8584  
Alphomelon Deans29[1046]DHJPAR0059035|Costa Rica|661[0n]|BOLD:AAB8584  
Alphomelon Deans29[1047]DHJPAR0059027|Costa Rica|661[0n]|BOLD:AAB8584  
Alphomelon Deans29[1048]DHJPAR0059039|Costa Rica|661[0n]|BOLD:AAB8584  
Alphomelon Deans29[1049]DHJPAR0059036|Costa Rica|661[0n]|BOLD:AAB8584  
Alphomelon Deans29[1050]DHJPAR0053026|Costa Rica|658[0n]|BOLD:AAB8584  
Alphomelon Deans29[1051]DHJPAR0059044|Costa Rica|661[0n]|BOLD:AAB8584  
Alphomelon Deans29[1052]DHJPAR0059052|Costa Rica|658[0n]|BOLD:AAB8584  
Alphomelon Deans29[1053]DHJPAR0059049|Costa Rica|658[0n]|BOLD:AAB8584  
Alphomelon Deans29[1054]DHJPAR0061611|Costa Rica|658[0n]|BOLD:AAB8584  
Alphomelon Deans29[1055]DHJPAR0059054|Costa Rica|658[0n]|BOLD:AAB8584  
Alphomelon Deans29[1056]DHJPAR0042501|Costa Rica|658[0n]|BOLD:AAB8584  
Alphomelon Deans29[1057]DHJPAR0042494|Costa Rica|658[0n]|BOLD:AAB8584  
Alphomelon Deans29[1058]DHJPAR0041641|Costa Rica|658[0n]|BOLD:AAB8584  
Alphomelon Deans29[1059]DHJPAR0058995|Costa Rica|661[0n]|BOLD:AAB8584  
Alphomelon Deans29[1060]DHJPAR0059780|Costa Rica|658[0n]|BOLD:AAB8584  
Alphomelon Deans29[1061]DHJPAR0043075|Costa Rica|658[0n]|BOLD:AAB8584  
Alphomelon Deans29[1062]DHJPAR0059686|Costa Rica|658[0n]|BOLD:AAB8584  
Alphomelon Deans29[1063]DHJPAR0042468|Costa Rica|658[0n]|BOLD:AAB8584

Alphomelon Deans29[1062]DHJPAR0059686|Costa Rica|658[0n]|BOLD:AAB8584  
 Alphomelon Deans29[1063]DHJPAR0042468|Costa Rica|658[0n]|BOLD:AAB8584  
 Alphomelon Deans29[1064]DHJPAR0042056|Costa Rica|658[0n]|BOLD:AAB8584  
 Alphomelon Deans29[1065]DHJPAR0042441|Costa Rica|658[0n]|BOLD:AAB8584  
 Alphomelon Deans29[1066]DHJPAR0043094|Costa Rica|658[0n]|BOLD:AAB8584  
 Alphomelon Deans29[1067]DHJPAR0043092|Costa Rica|658[0n]|BOLD:AAB8584  
 Alphomelon Deans29[1068]DHJPAR0043077|Costa Rica|658[0n]|BOLD:AAB8584  
 Alphomelon Deans29[1069]DHJPAR0043076|Costa Rica|658[0n]|BOLD:AAB8584  
 Alphomelon Deans29[1070]DHJPAR0043130|Costa Rica|658[0n]|BOLD:AAB8584  
 Alphomelon Deans29[1071]DHJPAR0043127|Costa Rica|658[0n]|BOLD:AAB8584  
 Alphomelon Deans29[1072]DHJPAR0043122|Costa Rica|658[0n]|BOLD:AAB8584  
 Alphomelon Deans29[1073]DHJPAR0043110|Costa Rica|658[0n]|BOLD:AAB8584  
 Alphomelon Deans29[1074]DHJPAR0043004|Costa Rica|658[0n]|BOLD:AAB8584  
 Alphomelon Deans29[1075]DHJPAR0041858|Costa Rica|658[0n]|BOLD:AAB8584  
 Alphomelon Deans29[1076]DHJPAR0042052|Costa Rica|658[0n]|BOLD:AAB8584  
 Alphomelon Deans29[1077]DHJPAR0043009|Costa Rica|658[0n]|BOLD:AAB8584  
 Alphomelon Deans29[1078]DHJPAR0042412|Costa Rica|658[0n]|BOLD:AAB8584  
 Alphomelon Deans29[1079]DHJPAR0043087|Costa Rica|658[0n]|BOLD:AAB8584  
 Alphomelon Deans29[1080]DHJPAR0043005|Costa Rica|658[0n]|BOLD:AAB8584  
 Alphomelon Deans29[1081]DHJPAR0042481|Costa Rica|658[0n]|BOLD:AAB8584  
 Alphomelon Deans29[1082]DHJPAR0042434|Costa Rica|658[0n]|BOLD:AAB8584  
 Alphomelon Deans29[1083]DHJPAR0060274|Costa Rica|658[0n]|BOLD:AAB8584  
 Alphomelon Deans29[1084]DHJPAR0060273|Costa Rica|658[0n]|BOLD:AAB8584  
 Alphomelon Deans29[1085]DHJPAR0060265|Costa Rica|658[0n]|BOLD:AAB8584  
 Alphomelon Deans29[1086]DHJPAR0049465|Costa Rica|658[0n]|BOLD:AAB8584  
 Alphomelon Deans29[1087]DHJPAR0042471|Costa Rica|658[0n]|BOLD:AAB8584  
 Alphomelon Deans29[1088]DHJPAR0042456|Costa Rica|658[0n]|BOLD:AAB8584  
 Alphomelon Deans29[1089]DHJPAR0059007|Costa Rica|661[0n]|BOLD:AAB8584  
 Alphomelon Deans29[1090]DHJPAR0042049|Costa Rica|658[0n]|BOLD:AAB8584  
 Alphomelon Deans29[1091]DHJPAR0061836|Costa Rica|658[0n]|BOLD:AAB8584  
 Alphomelon Deans29[1092]DHJPAR0043126|Costa Rica|658[0n]|BOLD:AAB8584  
 Alphomelon Deans29[1093]DHJPAR0061850|Costa Rica|658[0n]|BOLD:AAB8584  
 Alphomelon Deans29[1094]DHJPAR0042444|Costa Rica|658[0n]|BOLD:AAB8584  
 Alphomelon Deans29[1095]DHJPAR0042445|Costa Rica|658[0n]|BOLD:AAB8584  
 Alphomelon Deans29[1096]DHJPAR0055526|Costa Rica|658[0n]|BOLD:AAB8584  
 Alphomelon Deans29[1097]DHJPAR0042051|Costa Rica|658[0n]|BOLD:AAB8584  
 Alphomelon Deans29[1098]DHJPAR0042447|Costa Rica|658[0n]|BOLD:AAB8584  
 Alphomelon Deans29[1099]DHJPAR0055561|Costa Rica|661[0n]|BOLD:AAB8584  
 Alphomelon Deans29[1100]DHJPAR0042457|Costa Rica|658[0n]|BOLD:AAB8584  
 Alphomelon Deans29[1101]DHJPAR0059034|Costa Rica|661[0n]|BOLD:AAB8584  
 Alphomelon Deans29[1102]DHJPAR0042459|Costa Rica|658[0n]|BOLD:AAB8584  
 Alphomelon Deans29[1103]DHJPAR0042467|Costa Rica|658[0n]|BOLD:AAB8584  
 Alphomelon Deans29[1104]DHJPAR0059040|Costa Rica|661[0n]|BOLD:AAB8584  
 Alphomelon Deans29[1105]DHJPAR0042436|Costa Rica|658[0n]|BOLD:AAB8584  
 Alphomelon Deans29[1106]DHJPAR0041852|Costa Rica|329[3n]  
 Alphomelon Deans29[1107]DHJPAR0041845|Costa Rica|530[0n]|BOLD:AAB8584  
 Alphomelon Deans29[1108]DHJPAR0059776|Costa Rica|658[0n]|BOLD:AAB8584  
 Alphomelon Deans29[1109]DHJPAR0049916|Costa Rica|658[0n]|BOLD:AAB8584  
 Alphomelon Deans29[1110]DHJPAR0042486|Costa Rica|658[0n]|BOLD:AAB8584  
 Alphomelon melanoscelsis[1111]BIOUG24734-D06|Argentina|585[0n]|BOLD:AAB8584  
 Alphomelon melanoscelsis[1112]CNCHYM 00034|Colombia|442[0n]|BOLD:AAB8584  
 Alphomelon Deans03[1113]DHJPAR0013792|Costa Rica|596[0n]|BOLD:ADJ6568  
 Alphomelon Deans03[1114]DHJPAR0058247|Costa Rica|658[0n]|BOLD:ADJ6568  
 Alphomelon Deans03[1115]DHJPAR0058277|Costa Rica|621[0n]|BOLD:ADJ6568  
 Alphomelon Deans03[1116]DHJPAR0058259|Costa Rica|658[0n]|BOLD:ADJ6568  
 Alphomelon Deans03[1117]DHJPAR0004804|Costa Rica|554[0n]|BOLD:ADJ6568  
 Alphomelon Deans03[1118]DHJPAR0047189|Costa Rica|658[0n]|BOLD:ADJ6568  
 Alphomelon Deans03[1119]DHJPAR0058258|Costa Rica|658[0n]|BOLD:ADJ6568  
 Alphomelon Deans03[1120]DHJPAR0059048|Costa Rica|658[0n]|BOLD:ADJ6568  
 Alphomelon Deans03[1121]DHJPAR0058274|Costa Rica|658[0n]|BOLD:ADJ6568  
 Alphomelon Deans03[1122]DHJPAR0058271|Costa Rica|658[0n]|BOLD:ADJ6568  
 Alphomelon Deans03[1123]DHJPAR0058269|Costa Rica|658[0n]|BOLD:ADJ6568  
 Alphomelon Deans03[1124]DHJPAR0020103|Costa Rica|578[1n]|BOLD:ADJ6568  
 Alphomelon Deans03[1125]DHJPAR0002481|Costa Rica|614[0n]|BOLD:ADJ6568  
 Alphomelon Deans03[1126]DHJPAR0004807|Costa Rica|577[2n]|BOLD:ADJ6568  
 Alphomelon Deans03[1127]DHJPAR0025344|Costa Rica|645[0n]|BOLD:ADJ6568  
 Alphomelon Deans03[1128]DHJPAR0025843|Costa Rica|657[0n]|BOLD:ADJ6568  
 Alphomelon Deans03[1129]DHJPAR0049260|Costa Rica|658[0n]|BOLD:ADJ6568  
 Alphomelon Deans03[1130]DHJPAR0055291|Costa Rica|658[0n]|BOLD:ADJ6568  
 Alphomelon Deans03[1131]DHJPAR0049212|Costa Rica|658[0n]|BOLD:ADJ6568  
 Alphomelon Deans03[1132]DHJPAR0049254|Costa Rica|658[0n]|BOLD:ADJ6568  
 Alphomelon Deans03[1133]DHJPAR0049250|Costa Rica|658[0n]|BOLD:ADJ6568  
 Alphomelon Deans03[1134]DHJPAR0049244|Costa Rica|658[0n]|BOLD:ADJ6568  
 Alphomelon Deans03[1135]DHJPAR0058244|Costa Rica|658[0n]|BOLD:ADJ6568  
 Alphomelon Deans03[1136]DHJPAR0058238|Costa Rica|658[0n]|BOLD:ADJ6568  
 Alphomelon Deans03[1137]DHJPAR0048182|Costa Rica|658[0n]|BOLD:ADJ6568  
 Alphomelon Deans03[1138]DHJPAR0012877|Costa Rica|657[0n]|BOLD:ADJ6568  
 Alphomelon Deans03[1139]DHJPAR0058262|Costa Rica|658[0n]|BOLD:ADJ6568  
 Alphomelon Deans03[1140]DHJPAR0058252|Costa Rica|658[0n]|BOLD:ADJ6568  
 Alphomelon Deans03[1141]DHJPAR0031673|Costa Rica|658[0n]|BOLD:ADJ6568  
 Alphomelon Deans03[1142]DHJPAR0031677|Costa Rica|658[0n]|BOLD:ADJ6568  
 Alphomelon Deans03[1143]DHJPAR0031675|Costa Rica|658[0n]|BOLD:ADJ6568  
 Alphomelon Deans03[1144]DHJPAR0031615|Costa Rica|658[0n]|BOLD:ADJ6568  
 Alphomelon Deans03[1145]DHJPAR0031609|Costa Rica|658[0n]|BOLD:ADJ6568  
 Alphomelon Deans03[1146]DHJPAR0030810|Costa Rica|657[0n]|BOLD:ADJ6568  
 Alphomelon Deans03[1147]DHJPAR0005027|Costa Rica|657[0n]|BOLD:ADJ6568  
 Alphomelon Deans03[1148]DHJPAR0048880|Costa Rica|658[0n]|BOLD:ADJ6568  
 Alphomelon Deans03[1149]DHJPAR0047217|Costa Rica|658[0n]|BOLD:ADJ6568  
 Alphomelon Deans03[1150]DHJPAR0031661|Costa Rica|629[0n]|BOLD:ADJ6568  
 Alphomelon Deans03[1151]DHJPAR0043085|Costa Rica|658[0n]|BOLD:ADJ6568  
 Alphomelon Deans03[1152]DHJPAR0031647|Costa Rica|658[0n]|BOLD:ADJ6568  
 Alphomelon Deans03[1153]BIOUG29282-E11|Costa Rica|585[0n]|BOLD:ADJ6568  
 Alphomelon Deans03[1154]BIOUG05082-G11|Costa Rica|633[0n]|BOLD:ADJ6568  
 Alphomelon Deans03[1155]BIOUG64900-A06|Costa Rica|640[0n]|BOLD:ADJ6568  
 Alphomelon Deans03[1156]DHJPAR0031680|Costa Rica|658[0n]|BOLD:ADJ6568  
 Alphomelon Deans03[1157]DHJPAR0031676|Costa Rica|658[0n]|BOLD:ADJ6568  
 Alphomelon Deans03[1158]DHJPAR0031670|Costa Rica|658[0n]|BOLD:ADJ6568  
 Alphomelon Deans03[1159]DHJPAR0031612|Costa Rica|658[0n]|BOLD:ADJ6568  
 Alphomelon Deans03[1160]DHJPAR0049243|Costa Rica|658[0n]|BOLD:ADJ6568

Alphomelon Deans03[[1158]]DHJPAR0031670|Costa Rica|658[0n]]BOLD:ADJ6568  
Alphomelon Deans03[[1159]]DHJPAR0031612|Costa Rica|658[0n]]BOLD:ADJ6568  
Alphomelon Deans03[[1160]]DHJPAR0049243|Costa Rica|658[0n]]BOLD:ADJ6568  
Alphomelon Deans03[[1161]]DHJPAR0049377|Costa Rica|658[0n]]BOLD:ADJ6568  
Alphomelon Deans03[[1162]]DHJPAR0031643|Costa Rica|658[0n]]BOLD:ADJ6568  
Alphomelon Deans03[[1163]]DHJPAR0059056|Costa Rica|658[0n]]BOLD:ADJ6568  
Alphomelon Deans03[[1164]]DHJPAR0047175|Costa Rica|658[0n]]BOLD:ADJ6568  
Alphomelon Deans03[[1165]]DHJPAR0059014|Costa Rica|661[0n]]BOLD:ADJ6568  
Alphomelon Deans03[[1166]]BIOUG09826-F12|Costa Rica|595[0n]]BOLD:ADJ6568  
Alphomelon Deans03[[1167]]BIOUG09740-D10|Costa Rica|594[0n]]BOLD:ADJ6568  
Alphomelon Deans03[[1168]]BIOUG10237-C12|Costa Rica|590[0n]]BOLD:ADJ6568  
Alphomelon Deans03[[1169]]BIOUG08355-D12|Costa Rica|588[0n]]BOLD:ADJ6568  
Alphomelon Deans03[[1170]]BIOUG17759-G05|Costa Rica|567[0n]]BOLD:ADJ6568  
Alphomelon Deans03[[1171]]DHJPAR0004680|Costa Rica|657[0n]]BOLD:ADJ6568  
Alphomelon Deans03[[1172]]DHJPAR0020621|Costa Rica|657[0n]]BOLD:ADJ6568  
Alphomelon Deans03[[1173]]BIOUG63286-H09|Costa Rica|641[0n]]BOLD:ADJ6568  
Alphomelon Deans03[[1174]]DHJPAR0031681|Costa Rica|658[0n]]BOLD:ADJ6568  
Alphomelon Deans03[[1175]]DHJPAR0031655|Costa Rica|658[0n]]BOLD:ADJ6568  
Alphomelon Deans03[[1176]]DHJPAR0031659|Costa Rica|658[0n]]BOLD:ADJ6568  
Alphomelon Deans03[[1177]]DHJPAR0031671|Costa Rica|658[0n]]BOLD:ADJ6568  
Alphomelon Deans03[[1178]]DHJPAR0031617|Costa Rica|658[0n]]BOLD:ADJ6568  
Alphomelon Deans03[[1179]]DHJPAR0031660|Costa Rica|658[0n]]BOLD:ADJ6568  
Alphomelon Deans03[[1180]]DHJPAR0031618|Costa Rica|658[0n]]BOLD:ADJ6568  
Alphomelon Deans03[[1181]]DHJPAR0031674|Costa Rica|658[0n]]BOLD:ADJ6568  
Alphomelon Deans03[[1182]]DHJPAR0031611|Costa Rica|658[0n]]BOLD:ADJ6568  
Alphomelon Deans03[[1183]]DHJPAR0031613|Costa Rica|658[0n]]BOLD:ADJ6568  
Alphomelon Deans03[[1184]]BIOUG63806-D10|Costa Rica|655[0n]]BOLD:ADJ6568  
Alphomelon Deans03[[1185]]BIOUG08267-D12|Costa Rica|602[0n]]BOLD:ADJ6568  
Alphomelon Deans03[[1186]]BIOUG17530-F01|Costa Rica|588[0n]]BOLD:ADJ6568  
Alphomelon Deans03[[1187]]BIOUG10017-A08|Costa Rica|568[0n]]BOLD:ADJ6568  
Alphomelon Deans03[[1188]]BIOUG13945-H05|Costa Rica|588[0n]]BOLD:ADJ6568  
Alphomelon Deans03[[1189]]BIOUG18764-F10|Costa Rica|588[0n]]BOLD:ADJ6568  
Alphomelon Deans03[[1190]]DHJPAR0031619|Costa Rica|658[0n]]BOLD:ADJ6568  
Alphomelon Deans03[[1191]]DHJPAR0025868|Costa Rica|657[0n]]BOLD:ADJ6568  
Alphomelon Deans04[[1192]]DHJPAR0034215|Costa Rica|652[0n]]BOLD:AAJ2135  
Alphomelon Deans04[[1193]]DHJPAR0064610|Costa Rica|658[0n]]BOLD:AAJ2135  
Alphomelon Deans04[[1194]]DHJPAR0041859|Costa Rica|658[0n]]BOLD:AAJ2135  
Alphomelon Deans04[[1195]]DHJPAR0002397|Costa Rica|657[1n]]BOLD:AAJ2135  
Alphomelon Deans05[[1196]]DHJPAR0002456|Costa Rica|613[0n]]BOLD:AACT7653  
Alphomelon Deans05[[1197]]DHJPAR0011851|Costa Rica|657[2n]]BOLD:AACT7653  
Alphomelon Deans05[[1198]]DHJPAR0002434|Costa Rica|657[2n]]BOLD:AACT7653  
Alphomelon Deans05[[1199]]DHJPAR0002462|Costa Rica|657[0n]]BOLD:AACT7653  
Alphomelon Deans05[[1200]]DHJPAR0004670|Costa Rica|657[0n]]BOLD:AACT7653  
Alphomelon Deans05[[1201]]DHJPAR0004668|Costa Rica|657[0n]]BOLD:AACT7653  
Alphomelon Deans05[[1202]]DHJPAR0012417|Costa Rica|657[0n]]BOLD:AACT7653  
Alphomelon Deans05[[1203]]DHJPAR0005021|Costa Rica|657[0n]]BOLD:AACT7653  
Alphomelon Deans05[[1204]]DHJPAR0031004|Costa Rica|658[0n]]BOLD:AACT7653  
Alphomelon Deans05[[1205]]DHJPAR0012121|Costa Rica|657[0n]]BOLD:AACT7653  
Alphomelon nigriceps[[1206]]CNCHYM 00045|Argentina|573[0n]]BOLD:AAZ9859  
Alphomelon nigriceps[[1207]]CNCHYM 00044|Curacao|458[1n]]  
Alphomelon[[1208]]07TAPACH-00440|Mexico|563[3n]]BOLD:ABZ3852  
Alphomelon[[1209]]07TAPACH-00471|Mexico|537[2n]]BOLD:ABZ3852  
Alphomelon[[1210]]07TAPACH-00439|Mexico|645[2n]]BOLD:ABZ3852  
Alphomelon[[1211]]BIOUG90202-C03|Mexico|652[0n]]BOLD:AAE5720  
Alphomelon[[1212]]BIOUG66151-B01|Mexico|654[0n]]BOLD:AAE5720  
Alphomelon[[1213]]BIOUG90390-D04|Mexico|653[0n]]BOLD:AAE5720  
Alphomelon[[1214]]BIOUG89219-F07|Mexico|652[0n]]BOLD:AAE5720  
Alphomelon[[1215]]BIOUG90390-H03|Mexico|654[0n]]BOLD:AAE5720  
Alphomelon Deans23[[1216]]DHJPAR0026269|Costa Rica|621[0n]]BOLD:AAE5720  
Alphomelon[[1217]]07TAPACH-01693|Mexico|421[0n]]BOLD:AAE5720  
Alphomelon Deans23[[1218]]DHJPAR0012536|Costa Rica|631[0n]]BOLD:AAE5720  
Alphomelon Deans23[[1219]]DHJPAR0026284|Costa Rica|657[0n]]BOLD:AAE5720  
Alphomelon Deans23[[1220]]DHJPAR0039877|Costa Rica|658[0n]]BOLD:AAE5720  
Alphomelon Deans23[[1221]]DHJPAR0026095|Costa Rica|657[0n]]BOLD:AAE5720  
Alphomelon[[1222]]07TAPACH-01674|Mexico|658[0n]]BOLD:AAE5720  
Alphomelon Deans23[[1223]]DHJPAR0057768|Costa Rica|658[0n]]BOLD:AAE5720  
Alphomelon Deans23[[1224]]DHJPAR0059057|Costa Rica|622[0n]]BOLD:AAE5720  
Alphomelon disputabile[[1225]]BIOUG62552-D06|Costa Rica|655[0n]]BOLD:AAF3301  
Alphomelon disputabile[[1226]]DHJPAR0061875|Costa Rica|658[0n]]BOLD:AAF3301  
Alphomelon disputabile[[1227]]DHJPAR0004956|Costa Rica|645[1n]]BOLD:AAF3301  
Alphomelon disputabile[[1228]]DHJPAR0004960|Costa Rica|657[9n]]BOLD:AAF3301  
Alphomelon disputabile[[1229]]DHJPAR0013664|Costa Rica|540[0n]]BOLD:AAF3301  
Alphomelon disputabile[[1230]]DHJPAR0031614|Costa Rica|658[0n]]BOLD:AAF3301  
Alphomelon disputabile[[1231]]DHJPAR00058253|Costa Rica|658[0n]]BOLD:AAF3301  
Alphomelon disputabile[[1232]]DHJPAR0061861|Costa Rica|658[0n]]BOLD:AAF3301  
Alphomelon disputabile[[1233]]DHJPAR00059067|Costa Rica|658[0n]]BOLD:AAF3301  
Alphomelon Deans18DHJ01[[1234]]DHJPAR0004811|Costa Rica|644[0n]]BOLD:AAF3318  
Alphomelon Deans18DHJ01[[1235]]DHJPAR0004810|Costa Rica|657[8n]]  
Alphomelon Deans18DHJ02[[1236]]DHJPAR00034186|Costa Rica|658[0n]]BOLD:ADA5721  
Alphomelon[[1237]]BIOUG26457-C04|Mexico|564[0n]]BOLD:ADA5721  
Alphomelon Deans18DHJ03[[1238]]DHJPAR00058241|Costa Rica|658[0n]]BOLD:ADA7564  
Alphomelon Deans18DHJ03[[1239]]DHJPAR00058242|Costa Rica|658[0n]]BOLD:ADA7564  
Alphomelon Deans18DHJ03[[1240]]DHJPAR00058246|Costa Rica|658[0n]]BOLD:ADA7564  
Alphomelon Deans18DHJ03[[1241]]DHJPAR00058250|Costa Rica|658[0n]]BOLD:ADA7564  
Alphomelon Deans18DHJ03[[1242]]DHJPAR00058239|Costa Rica|658[0n]]BOLD:ADA7564  
Alphomelon Deans18DHJ03[[1243]]DHJPAR00058283|Costa Rica|658[0n]]BOLD:ADA7564  
Alphomelon Deans18DHJ03[[1244]]DHJPAR00058255|Costa Rica|658[0n]]BOLD:ADA7564  
Alphomelon Deans18DHJ03[[1245]]DHJPAR00059026|Costa Rica|661[0n]]BOLD:ADA7564  
Alphomelon Deans18DHJ03[[1246]]DHJPAR00059045|Costa Rica|661[1n]]BOLD:ADA7564  
Alphomelon Deans18DHJ03[[1247]]DHJPAR00058248|Costa Rica|658[0n]]BOLD:ADA7564  
Alphomelon Deans18DHJ03[[1248]]DHJPAR00058245|Costa Rica|658[0n]]BOLD:ADA7564  
Alphomelon Deans18DHJ03[[1249]]DHJPAR00058264|Costa Rica|658[0n]]BOLD:ADA7564  
Alphomelon Deans18DHJ03[[1250]]DHJPAR00060271|Costa Rica|658[0n]]BOLD:ADA7564  
Alphomelon Deans18DHJ03[[1251]]DHJPAR00048219|Costa Rica|658[0n]]BOLD:ADA7564  
Alphomelon Deans18DHJ03[[1252]]DHJPAR00058251|Costa Rica|658[0n]]BOLD:ADA7564  
Alphomelon Deans18DHJ03[[1253]]DHJPAR00058270|Costa Rica|658[0n]]BOLD:ADA7564  
Alphomelon Deans18DHJ03[[1254]]DHJPAR00058254|Costa Rica|658[0n]]BOLD:ADA7564  
Alphomelon Deans18DHJ03[[1255]]DHJPAR0062082|Costa Rica|658[0n]]BOLD:ADA7564

# BOLD TaxonID Tree

Title : Tree Result - DS-ALPHOMEL (1295 records selected)  
Date : 14-Apr-2023  
Data Type : Nucleotide  
Distance Model : Kimura 2 Parameter  
Marker : COI-5P  
Colourization : [blue]=Stop Codons [red]=Contamination or misidentification

Label : Sample ID  
Label : Taxon  
Label : Country  
Label : Barcode Cluster (BIN)

Filter : length > 500bp only  
Filter : exclude records flagged as misidentifications  
Filter : exclude records with stop codons  
Filter : exclude contaminants

Sequence Count : 1241  
Species count : 35  
Genus count : 1  
Family count : 1  
Unidentified : 15

BIN Count : 37





Alphomelon arecaphileDHJ02[94]DHJPAR0038135Costa RicaBOLD: AAB0787  
Alphomelon arecaphileDHJ02[95]DHJPAR0012870Costa RicaBOLD: AAB0787  
Alphomelon arecaphileDHJ02[96]DHJPAR0012873Costa RicaBOLD: AAB0787  
Alphomelon arecaphileDHJ02[97]DHJPAR0057779Costa RicaBOLD: AAB0787  
Alphomelon arecaphileDHJ02[98]DHJPAR0058840Costa RicaBOLD: AAB0787  
Alphomelon arecaphileDHJ02[99]DHJPAR0058843Costa RicaBOLD: AAB0787  
Alphomelon arecaphileDHJ02[100]DHJPAR0058939Costa RicaBOLD: AAB0787  
Alphomelon arecaphileDHJ02[101]DHJPAR0058942Costa RicaBOLD: AAB0787  
Alphomelon arecaphileDHJ02[102]DHJPAR0058948Costa RicaBOLD: AAB0787  
Alphomelon arecaphileDHJ02[103]DHJPAR0060234Costa RicaBOLD: AAB0787  
Alphomelon arecaphileDHJ02[104]DHJPAR0058981Costa RicaBOLD: AAB0787  
Alphomelon arecaphileDHJ02[105]DHJPAR0058982Costa RicaBOLD: AAB0787  
Alphomelon arecaphileDHJ02[106]DHJPAR0051778Costa RicaBOLD: AAB0787  
Alphomelon arecaphileDHJ02[107]DHJPAR0004907Costa RicaBOLD: AAB0787  
Alphomelon arecaphileDHJ02[108]DHJPAR0058957Costa RicaBOLD: AAB0787  
Alphomelon arecaphileDHJ02[109]DHJPAR00058195Costa RicaBOLD: AAB0787  
Alphomelon arecaphileDHJ02[110]DHJPAR0005020Costa RicaBOLD: AAB0787  
Alphomelon arecaphileDHJ02[111]DHJPAR0039878Costa RicaBOLD: AAB0787  
Alphomelon arecaphileDHJ02[112]DHJPAR0041775Costa RicaBOLD: AAB0787  
Alphomelon arecaphileDHJ02[113]DHJPAR0041794Costa RicaBOLD: AAB0787  
Alphomelon arecaphileDHJ02[114]DHJPAR0004926Costa RicaBOLD: AAB0787  
Alphomelon arecaphileDHJ02[115]DHJPAR0058895Costa RicaBOLD: AAB0787  
Alphomelon arecaphileDHJ02[116]DHJPAR00051032Costa RicaBOLD: AAB0787  
Alphomelon arecaphileDHJ02[117]DHJPAR00051038Costa RicaBOLD: AAB0787  
Alphomelon arecaphileDHJ02[118]DHJPAR0012705Costa RicaBOLD: AAB0787  
Alphomelon arecaphileDHJ02[119]DHJPAR0020200Costa RicaBOLD: AAB0787  
Alphomelon arecaphileDHJ02[120]DHJPAR0005066Costa RicaBOLD: AAB0787  
Alphomelon arecaphileDHJ02[121]DHJPAR0005018Costa RicaBOLD: AAB0787  
Alphomelon arecaphileDHJ02[122]DHJPAR0004916Costa RicaBOLD: AAB0787  
Alphomelon arecaphileDHJ02[123]DHJPAR0004911Costa RicaBOLD: AAB0787  
Alphomelon arecaphileDHJ02[124]DHJPAR0004883Costa RicaBOLD: AAB0787  
Alphomelon arecaphileDHJ02[125]DHJPAR0055257Costa RicaBOLD: AAB0787

Alphomelon melanoscelis[126]DHJPAR00051219Costa RicaBOLD: AAB6733  
Alphomelon melanoscelis[127]DHJPAR0004904Costa RicaBOLD: AAB6733  
Alphomelon melanoscelis[128]DHJPAR00057763Costa RicaBOLD: AAB6733  
Alphomelon melanoscelis[129]DHJPAR0004890Costa RicaBOLD: AAB6733  
Alphomelon melanoscelis[130]DHJPAR00060618Costa RicaBOLD: AAB6733  
Alphomelon melanoscelis[131]DHJPAR00034243Costa RicaBOLD: AAB6733  
Alphomelon melanoscelis[132]DHJPAR00055274Costa RicaBOLD: AAB6733  
Alphomelon melanoscelis[133]DHJPAR0002395Costa RicaBOLD: AAB6733  
Alphomelon melanoscelis[134]DHJPAR00058834Costa RicaBOLD: AAB6733  
Alphomelon melanoscelis[135]DHJPAR00058841Costa RicaBOLD: AAB6733  
Alphomelon melanoscelis[136]DHJPAR00058842Costa RicaBOLD: AAB6733  
Alphomelon melanoscelis[137]DHJPAR00058844Costa RicaBOLD: AAB6733  
Alphomelon melanoscelis[138]DHJPAR00058848Costa RicaBOLD: AAB6733  
Alphomelon melanoscelis[139]DHJPAR00058866Costa RicaBOLD: AAB6733  
Alphomelon melanoscelis[140]DHJPAR00058888Costa RicaBOLD: AAB6733  
Alphomelon melanoscelis[141]DHJPAR00060625Costa RicaBOLD: AAB6733  
Alphomelon melanoscelis[142]DHJPAR00058941Costa RicaBOLD: AAB6733  
Alphomelon melanoscelis[143]DHJPAR00058946Costa RicaBOLD: AAB6733  
Alphomelon melanoscelis[144]DHJPAR00058954Costa RicaBOLD: AAB6733  
Alphomelon melanoscelis[145]DHJPAR00058964Costa RicaBOLD: AAB6733  
Alphomelon melanoscelis[146]DHJPAR00058980Costa RicaBOLD: AAB6733  
Alphomelon melanoscelis[147]DHJPAR00058983Costa RicaBOLD: AAB6733  
Alphomelon melanoscelis[148]DHJPAR0004899Costa RicaBOLD: AAB6733  
Alphomelon melanoscelis[149]DHJPAR0004908Costa RicaBOLD: AAB6733  
Alphomelon melanoscelis[150]DHJPAR0004913Costa RicaBOLD: AAB6733  
Alphomelon melanoscelis[151]DHJPAR0004918Costa RicaBOLD: AAB6733  
Alphomelon melanoscelis[152]DHJPAR0012412Costa RicaBOLD: AAB6733  
Alphomelon melanoscelis[153]DHJPAR0012419Costa RicaBOLD: AAB6733  
Alphomelon melanoscelis[154]DHJPAR0012425Costa RicaBOLD: AAB6733  
Alphomelon melanoscelis[155]DHJPAR00060630Costa RicaBOLD: AAB6733  
Alphomelon melanoscelis[156]DHJPAR00020291Costa RicaBOLD: AAB6733  
Alphomelon melanoscelis[157]DHJPAR00061666Costa RicaBOLD: AAB6733  
Alphomelon melanoscelis[158]DHJPAR00058177Costa RicaBOLD: AAB6733  
Alphomelon melanoscelis[159]DHJPAR00058156Costa RicaBOLD: AAB6733  
Alphomelon melanoscelis[160]DHJPAR00060232Costa RicaBOLD: AAB6733  
Alphomelon melanoscelis[161]DHJPAR00057502Costa RicaBOLD: AAB6733  
Alphomelon melanoscelis[162]DHJPAR00041766Costa RicaBOLD: AAB6733  
Alphomelon melanoscelis[163]DHJPAR00057514Costa RicaBOLD: AAB6733  
Alphomelon melanoscelis[164]DHJPAR00041692Costa RicaBOLD: AAB6733  
Alphomelon melanoscelis[165]DHJPAR00058213Costa RicaBOLD: AAB6733  
Alphomelon melanoscelis[166]DHJPAR00041714Costa RicaBOLD: AAB6733  
Alphomelon melanoscelis[167]DHJPAR00041739Costa RicaBOLD: AAB6733  
Alphomelon melanoscelis[168]DHJPAR00058851Costa RicaBOLD: AAB6733  
Alphomelon melanoscelis[169]DHJPAR00041756Costa RicaBOLD: AAB6733  
Alphomelon melanoscelis[170]DHJPAR00058861Costa RicaBOLD: AAB6733  
Alphomelon melanoscelis[171]DHJPAR00061623Costa RicaBOLD: AAB6733  
Alphomelon melanoscelis[172]DHJPAR00058168Costa RicaBOLD: AAB6733  
Alphomelon melanoscelis[173]DHJPAR00058219Costa RicaBOLD: AAB6733  
Alphomelon melanoscelis[174]DHJPAR00060617Costa RicaBOLD: AAB6733  
Alphomelon melanoscelis[175]DHJPAR00059480Costa RicaBOLD: AAB6733  
Alphomelon melanoscelis[176]DHJPAR00058936Costa RicaBOLD: AAB6733  
Alphomelon melanoscelis[177]DHJPAR00061628Costa RicaBOLD: AAB6733  
Alphomelon melanoscelis[178]DHJPAR00055445Costa RicaBOLD: AAB6733  
Alphomelon melanoscelis[179]DHJPAR00057770Costa RicaBOLD: AAB6733  
Alphomelon melanoscelis[180]DHJPAR0012404Costa RicaBOLD: AAB6733  
Alphomelon melanoscelis[181]DHJPAR00020288Costa RicaBOLD: AAB6733  
Alphomelon melanoscelis[182]DHJPAR00012872Costa RicaBOLD: AAB6733  
Alphomelon melanoscelis[183]DHJPAR00004929Costa RicaBOLD: AAB6733  
Alphomelon melanoscelis[184]DHJPAR00034227Costa RicaBOLD: AAB6733  
Alphomelon melanoscelis[185]DHJPAR0005035Costa RicaBOLD: AAB6733  
Alphomelon melanoscelis[186]DHJPAR00034230Costa RicaBOLD: AAB6733

Alphomelon xestopygaDHJ05[187]DHJPAR0002449Costa RicaBOLD: AAA1634  
Alphomelon xestopygaDHJ05[188]DHJPAR0012390Costa RicaBOLD: AAA1634  
Alphomelon xestopygaDHJ05[189]DHJPAR0002411Costa RicaBOLD: AAA1634  
Alphomelon xestopygaDHJ05[190]DHJPAR0002367Costa RicaBOLD: AAA1634  
Alphomelon xestopygaDHJ05[191]DHJPAR0011926Costa RicaBOLD: AAA1634







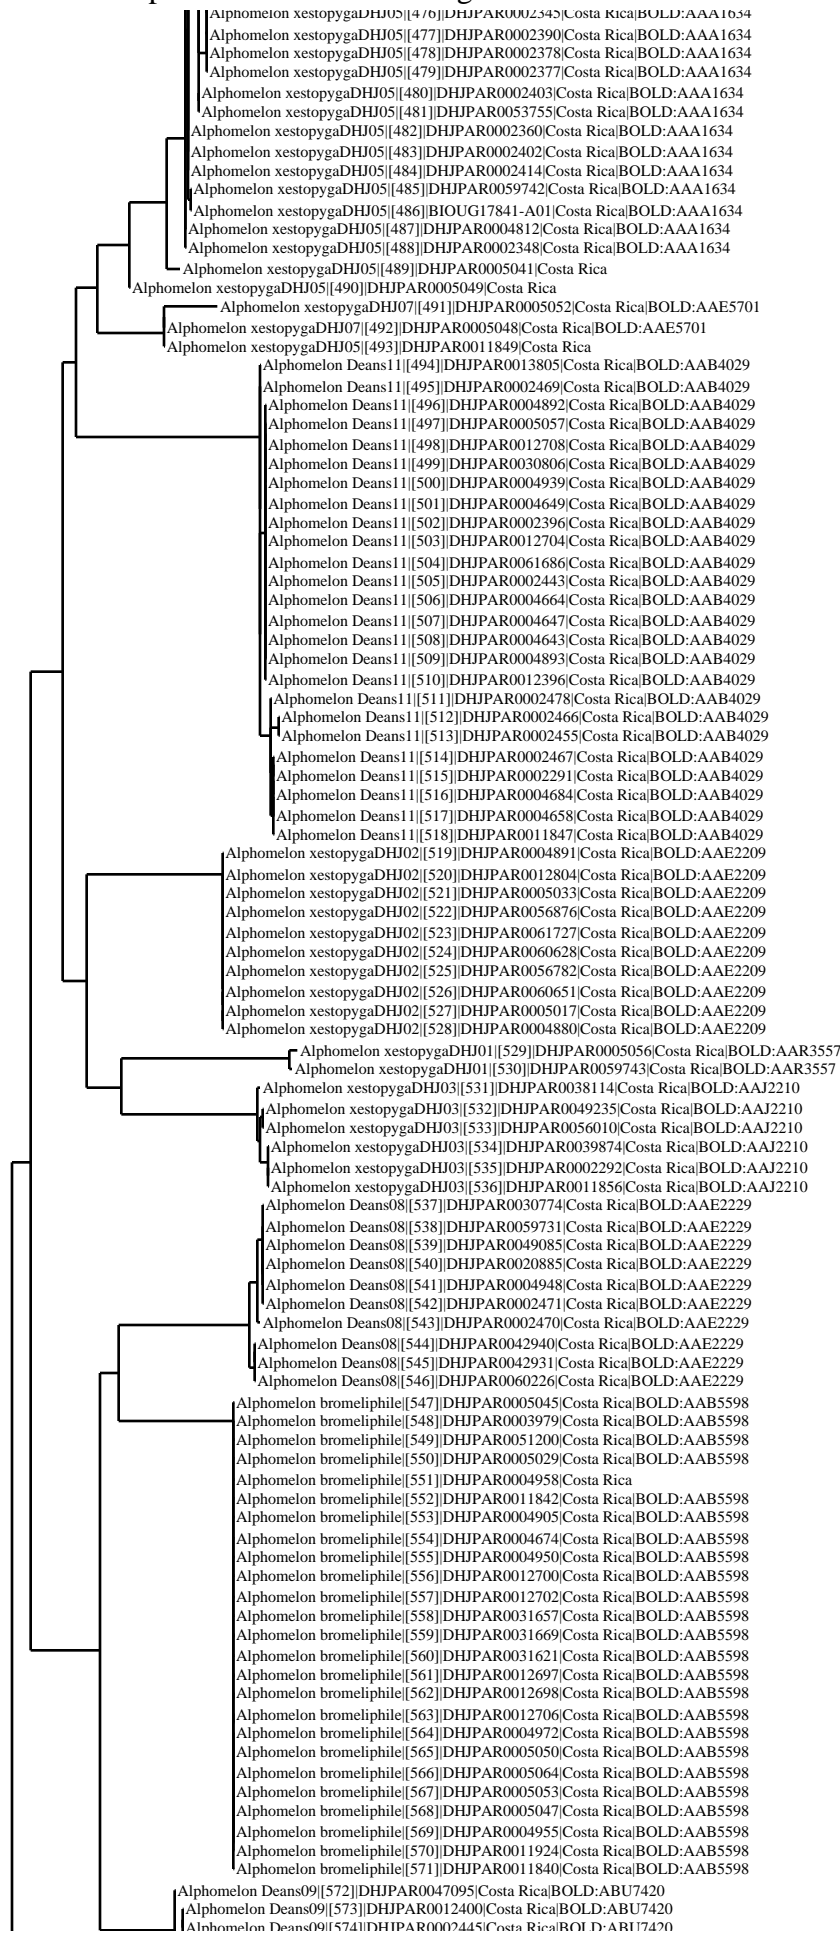

Alphomelon Deans09[572]DHJP0047095(Costa Rica)BOLD:ABU7420  
Alphomelon Deans09[573]DHJP00012400(Costa Rica)BOLD:ABU7420  
Alphomelon Deans09[574]DHJP00002445(Costa Rica)BOLD:ABU7420  
Alphomelon Deans09[575]DHJP00047120(Costa Rica)BOLD:ABU7420  
Alphomelon Deans09[576]DHJP00057788(Costa Rica)BOLD:ABU7420  
Alphomelon Deans09[577]DHJP00049095(Costa Rica)BOLD:ABU7420  
Alphomelon Deans09[578]DHJP00057786(Costa Rica)BOLD:ABU7420  
Alphomelon Deans09[579]DHJP00012416(Costa Rica)BOLD:ABU7420  
Alphomelon Deans09[580]DHJP00038112(Costa Rica)BOLD:ABU7420  
Alphomelon Deans09[581]DHJP00041758(Costa Rica)BOLD:ABU7420  
Alphomelon Deans09[582]DHJP00041807(Costa Rica)BOLD:ABU7420  
Alphomelon Deans09[583]DHJP00049225(Costa Rica)BOLD:ABU7420  
Alphomelon Deans09[584]DHJP00041820(Costa Rica)BOLD:ABU7420  
Alphomelon Deans09[585]DHJP00025653(Costa Rica)BOLD:ABU7420  
Alphomelon Deans09[586]DHJP00057793(Costa Rica)BOLD:ABU7420  
Alphomelon Deans09[587]DHJP00012701(Costa Rica)BOLD:ABU7420  
Alphomelon Deans09[588]DHJP0004885(Costa Rica)BOLD:ABU7420  
Alphomelon Deans09[589]DHJP00045224(Costa Rica)BOLD:ABU7420  
Alphomelon Deans09[590]DHJP0004935(Costa Rica)BOLD:ABU7420  
Alphomelon Deans09[591]DHJP0004940(Costa Rica)BOLD:ABU7420  
Alphomelon Deans09[592]DHJP00005116(Costa Rica)BOLD:ABU7420  
Alphomelon Deans09[593]DHJP0004882(Costa Rica)BOLD:ABU7420  
Alphomelon Deans09[594]DHJP00012857(Costa Rica)BOLD:ABU7420  
Alphomelon Deans09[595]DHJP00059482(Costa Rica)BOLD:ABU7420  
Alphomelon Deans09[596]DHJP00038270(Costa Rica)BOLD:ABU7420  
Alphomelon Deans09[597]DHJP00058212(Costa Rica)BOLD:ABU7420  
Alphomelon Deans09[598]DHJP00058207(Costa Rica)BOLD:ABU7420  
Alphomelon Deans09[599]DHJP00058201(Costa Rica)BOLD:ABU7420  
Alphomelon Deans09[600]DHJP00058161(Costa Rica)BOLD:ABU7420  
Alphomelon Deans09[601]DHJP00058153(Costa Rica)BOLD:ABU7420  
Alphomelon Deans09[602]DHJP00062108(Costa Rica)BOLD:ABU7420  
Alphomelon Deans09[603]DHJP00058838(Costa Rica)BOLD:ABU7420  
Alphomelon Deans09[604]DHJP00012699(Costa Rica)BOLD:ABU7420  
Alphomelon Deans09[605]DHJP00038962(Costa Rica)BOLD:ABU7420  
Alphomelon Deans09[606]DHJP00038957(Costa Rica)BOLD:ABU7420  
Alphomelon Deans09[607]DHJP00012859(Costa Rica)BOLD:ABU7420  
Alphomelon[608]CCDB-07374 F11(French Guiana)BOLD:AAV7443  
Alphomelon Deans12[609]DHJP0004805(Costa Rica)BOLD:AAB7535  
Alphomelon Deans12[610]DHJP00031126(Costa Rica)BOLD:AAB7535  
Alphomelon Deans12[611]DHJP00004654(Costa Rica)BOLD:AAB7535  
Alphomelon Deans12[612]DHJP00005019(Costa Rica)BOLD:AAB7535  
Alphomelon Deans12[613]DHJP00004917(Costa Rica)BOLD:AAB7535  
Alphomelon Deans12[614]DHJP00012414(Costa Rica)BOLD:AAB7535  
Alphomelon Deans12[615]DHJP00002460(Costa Rica)BOLD:AAB7535  
Alphomelon Deans12[616]DHJP00058188(Costa Rica)BOLD:AAB7535  
Alphomelon Deans12[617]DHJP00058190(Costa Rica)BOLD:AAB7535  
Alphomelon Deans12[618]DHJP00058209(Costa Rica)BOLD:AAB7535  
Alphomelon Deans12[619]DHJP00054695(Costa Rica)BOLD:AAB7535  
Alphomelon Deans12[620]DHJP00064147(Costa Rica)BOLD:AAB7535  
Alphomelon Deans12[621]DHJP00012120(Costa Rica)BOLD:AAB7535  
Alphomelon Deans12[622]DHJP00030875(Costa Rica)BOLD:AAB7535  
Alphomelon Deans12[623]DHJP00030883(Costa Rica)BOLD:AAB7535  
Alphomelon Deans12[624]DHJP00030932(Costa Rica)BOLD:AAB7535  
Alphomelon Deans12[625]DHJP00020276(Costa Rica)BOLD:AAB7535  
Alphomelon Deans12[626]DHJP00012710(Costa Rica)BOLD:AAB7535  
Alphomelon Deans12[627]DHJP00004924(Costa Rica)BOLD:AAB7535  
Alphomelon Deans12[628]DHJP00025847(Costa Rica)BOLD:AAB7535  
Alphomelon Deans12[629]BIOUG19726-B08(Costa Rica)BOLD:AAB7535  
Alphomelon Deans12[630]BIOUG28011-A06(Costa Rica)BOLD:AAB7535  
Alphomelon Deans12[631]DHJP0004888(Costa Rica)BOLD:AAB7535  
Alphomelon Deans12[632]DHJP00020280(Costa Rica)BOLD:AAB7535  
Alphomelon Deans12[633]DHJP00058963(Costa Rica)BOLD:AAB7535  
Alphomelon Deans12[634]DHJP00058962(Costa Rica)BOLD:AAB7535  
Alphomelon Deans12[635]DHJP00012863(Costa Rica)BOLD:AAB7535  
Alphomelon Deans12[636]DHJP00060154(Costa Rica)BOLD:AAB7535  
Alphomelon Deans13[637]DHJP0004802(Costa Rica)BOLD:AAA6775  
Alphomelon Deans13[638]DHJP00057765(Costa Rica)BOLD:AAA6775  
Alphomelon Deans13[639]DHJP00031132(Costa Rica)BOLD:AAA6775  
Alphomelon Deans13[640]DHJP0004898(Costa Rica)BOLD:AAA6775  
Alphomelon Deans13[641]DHJP0004949(Costa Rica)BOLD:AAA6775  
Alphomelon Deans13[642]DHJP00005061(Costa Rica)BOLD:AAA6775  
Alphomelon Deans13[643]DHJP00058160(Costa Rica)BOLD:AAA6775  
Alphomelon Deans13[644]DHJP00048159(Costa Rica)BOLD:AAA6775  
Alphomelon Deans13[645]DHJP00012707(Costa Rica)BOLD:AAA6775  
Alphomelon Deans13[646]DHJP00057515(Costa Rica)BOLD:AAA6775  
Alphomelon Deans13[647]DHJP00060156(Costa Rica)BOLD:AAA6775  
Alphomelon Deans13[648]DHJP00002498(Costa Rica)BOLD:AAA6775  
Alphomelon Deans13[649]DHJP00050981(Costa Rica)BOLD:AAA6775  
Alphomelon Deans13[650]DHJP00061754(Costa Rica)BOLD:AAA6775  
Alphomelon Deans13[651]DHJP00058205(Costa Rica)BOLD:AAA6775  
Alphomelon Deans13[652]DHJP00062582(Costa Rica)BOLD:AAA6775  
Alphomelon Deans13[653]DHJP00062590(Costa Rica)BOLD:AAA6775  
Alphomelon Deans13[654]DHJP00062593(Costa Rica)BOLD:AAA6775  
Alphomelon Deans13[655]DHJP00058867(Costa Rica)BOLD:AAA6775  
Alphomelon Deans13[656]DHJP00025786(Costa Rica)BOLD:AAA6775  
Alphomelon Deans13[657]DHJP00020596(Costa Rica)BOLD:AAA6775  
Alphomelon Deans13[658]DHJP0004937(Costa Rica)BOLD:AAA6775  
Alphomelon Deans13[659]DHJP0004969(Costa Rica)BOLD:AAA6775  
Alphomelon Deans13[660]DHJP0004971(Costa Rica)BOLD:AAA6775  
Alphomelon Deans13[661]DHJP00060613(Costa Rica)BOLD:AAA6775  
Alphomelon Deans13[662]DHJP0005060(Costa Rica)BOLD:AAA6775  
Alphomelon Deans13[663]DHJP00005114(Costa Rica)BOLD:AAA6775  
Alphomelon Deans13[664]DHJP00054746(Costa Rica)BOLD:AAA6775  
Alphomelon Deans13[665]DHJP00056706(Costa Rica)BOLD:AAA6775  
Alphomelon Deans13[666]DHJP00061719(Costa Rica)BOLD:AAA6775  
Alphomelon Deans13[667]DHJP00025617(Costa Rica)BOLD:AAA6775  
Alphomelon Deans13[668]DHJP00053774(Costa Rica)BOLD:AAA6775  
Alphomelon Deans13[669]DHJP00060621(Costa Rica)BOLD:AAA6775

Alphomelon Deans13[[667]]DHJPAR0053774|Costa Rica|BOLD:AAA6775  
Alphomelon Deans13[[668]]DHJPAR0053774|Costa Rica|BOLD:AAA6775  
Alphomelon Deans13[[669]]DHJPAR0060621|Costa Rica|BOLD:AAA6775  
Alphomelon Deans13[[670]]DHJPAR0060653|Costa Rica|BOLD:AAA6775  
Alphomelon Deans13[[671]]DHJPAR0053717|Costa Rica|BOLD:AAA6775  
Alphomelon Deans13[[672]]DHJPAR0056368|Costa Rica|BOLD:AAA6775  
Alphomelon Deans13[[673]]DHJPAR0030714|Costa Rica|BOLD:AAA6775  
Alphomelon Deans13[[674]]DHJPAR0002457|Costa Rica|BOLD:AAA6775  
Alphomelon Deans13[[675]]DHJPAR0004657|Costa Rica|BOLD:AAA6775  
Alphomelon Deans13[[676]]DHJPAR0004919|Costa Rica|BOLD:AAA6775  
Alphomelon Deans13[[677]]DHJPAR0004894|Costa Rica|BOLD:AAA6775  
Alphomelon Deans13[[678]]DHJPAR0012399|Costa Rica|BOLD:AAA6775  
Alphomelon Deans13[[679]]DHJPAR0061661|Costa Rica|BOLD:AAA6775  
Alphomelon Deans13[[680]]DHJPAR0020281|Costa Rica|BOLD:AAA6775  
Alphomelon Deans13[[681]]DHJPAR0058938|Costa Rica|BOLD:AAA6775  
Alphomelon Deans13[[682]]DHJPAR0058935|Costa Rica|BOLD:AAA6775  
Alphomelon Deans13[[683]]DHJPAR0058921|Costa Rica|BOLD:AAA6775  
Alphomelon Deans13[[684]]DHJPAR0058916|Costa Rica|BOLD:AAA6775  
Alphomelon Deans13[[685]]DHJPAR0058893|Costa Rica|BOLD:AAA6775  
Alphomelon Deans13[[686]]DHJPAR0058877|Costa Rica|BOLD:AAA6775  
Alphomelon Deans13[[687]]DHJPAR0058847|Costa Rica|BOLD:AAA6775  
Alphomelon Deans13[[688]]DHJPAR0056693|Costa Rica|BOLD:AAA6775  
Alphomelon Deans13[[689]]DHJPAR0012855|Costa Rica|BOLD:AAA6775  
Alphomelon Deans13[[690]]DHJPAR0046873|Costa Rica|BOLD:AAA6775  
Alphomelon Deans13[[691]]DHJPAR0064082|Costa Rica|BOLD:AAA6775  
Alphomelon Deans13[[692]]DHJPAR0026885|Costa Rica|BOLD:AAA6775  
Alphomelon Deans13[[693]]DHJPAR0005113|Costa Rica|BOLD:AAA6775  
Alphomelon Deans13[[694]]DHJPAR0025492|Costa Rica|BOLD:AAA6775  
Alphomelon Deans13[[695]]DHJPAR0005115|Costa Rica|BOLD:AAA6775  
Alphomelon Deans13[[696]]DHJPAR0004930|Costa Rica|BOLD:AAA6775  
Alphomelon Deans13[[697]]DHJPAR0030830|Costa Rica|BOLD:AAA6775  
Alphomelon Deans13[[698]]DHJPAR0030877|Costa Rica|BOLD:AAA6775  
Alphomelon Deans13[[699]]DHJPAR0042917|Costa Rica|BOLD:AAA6775  
Alphomelon Deans13[[700]]DHJPAR0002477|Costa Rica|BOLD:AAA6775  
Alphomelon Deans13[[701]]DHJPAR0004884|Costa Rica|BOLD:AAA6775  
Alphomelon Deans13[[702]]DHJPAR0020284|Costa Rica|BOLD:AAA6775  
Alphomelon Deans13[[703]]DHJPAR0060183|Costa Rica|BOLD:AAA6775  
Alphomelon Deans13[[704]]DHJPAR0060178|Costa Rica|BOLD:AAA6775  
Alphomelon Deans13[[705]]DHJPAR0012874|Costa Rica|BOLD:AAA6775  
Alphomelon Deans13[[706]]DHJPAR0063193|Costa Rica|BOLD:AAA6775  
Alphomelon Deans13[[707]]DHJPAR00039875|Costa Rica|BOLD:AAA6775  
Alphomelon Deans13[[708]]DHJPAR0002464|Costa Rica|BOLD:AAA6775  
Alphomelon Deans13[[709]]DHJPAR0004642|Costa Rica|BOLD:AAA6775  
Alphomelon Deans13[[710]]DHJPAR0025527|Costa Rica|BOLD:AAA6775  
Alphomelon Deans13[[711]]DHJPAR0057761|Costa Rica|BOLD:AAA6775  
Alphomelon Deans13[[712]]DHJPAR0012420|Costa Rica|BOLD:AAA6775  
Alphomelon Deans13[[713]]DHJPAR0004912|Costa Rica|BOLD:AAA6775  
Alphomelon Deans13[[714]]DHJPAR0002394|Costa Rica|BOLD:AAA6775  
Alphomelon Deans13[[715]]DHJPAR0002475|Costa Rica|BOLD:AAA6775  
Alphomelon Deans13[[716]]DHJPAR0002499|Costa Rica|BOLD:AAA6775  
Alphomelon Deans13[[717]]DHJPAR0025376|Costa Rica|BOLD:AAA6775  
Alphomelon Deans13[[718]]DHJPAR0062633|Costa Rica|BOLD:AAA6775  
Alphomelon Deans13[[719]]DHJPAR0004970|Costa Rica|BOLD:AAA6775  
Alphomelon Deans13[[720]]DHJPAR0005063|Costa Rica|BOLD:AAA6775  
Alphomelon Deans13[[721]]DHJPAR0064063|Costa Rica|BOLD:AAA6775  
Alphomelon Deans13[[722]]DHJPAR0002497|Costa Rica|BOLD:AAA6775  
Alphomelon Deans13[[723]]DHJPAR0056740|Costa Rica|BOLD:AAA6775  
Alphomelon Deans13[[724]]DHJPAR0050090|Costa Rica|BOLD:AAA6775  
Alphomelon Deans13[[725]]DHJPAR0060610|Costa Rica|BOLD:AAA6775  
Alphomelon Deans13[[726]]DHJPAR0011925|Costa Rica|BOLD:AAA6775  
Alphomelon Deans13[[727]]DHJPAR0004887|Costa Rica|BOLD:AAA6775  
Alphomelon Deans13[[728]]DHJPAR0004942|Costa Rica|BOLD:AAA6775  
Alphomelon Deans13[[729]]DHJPAR0030704|Costa Rica|BOLD:AAA6775  
Alphomelon Deans13[[730]]DHJPAR0030769|Costa Rica|BOLD:AAA6775  
Alphomelon Deans13[[731]]DHJPAR0002393|Costa Rica|BOLD:AAA6775  
Alphomelon Deans13[[732]]DHJPAR0025887|Costa Rica|BOLD:AAA6775  
Alphomelon Deans13[[733]]DHJPAR0060682|Costa Rica|BOLD:AAA6775  
Alphomelon nanosomal[[734]]DHJPAR0005058|Costa Rica  
Alphomelon nanosomal[[735]]DHJPAR0004056|Costa Rica|BOLD:AAB9792  
Alphomelon nanosomal[[736]]DHJPAR0005054|Costa Rica|BOLD:AAB9792  
Alphomelon nanosomal[[737]]DHJPAR0030720|Costa Rica|BOLD:AAB9792  
Alphomelon nanosomal[[738]]DHJPAR0053687|Costa Rica|BOLD:AAB9792  
Alphomelon nanosomal[[739]]DHJPAR0059486|Costa Rica|BOLD:AAB9792  
Alphomelon nanosomal[[740]]DHJPAR0051812|Costa Rica|BOLD:AAB9792  
Alphomelon nanosomal[[741]]DHJPAR0060601|Costa Rica|BOLD:AAB9792  
Alphomelon nanosomal[[742]]DHJPAR0060598|Costa Rica|BOLD:AAB9792  
Alphomelon nanosomal[[743]]DHJPAR0038967|Costa Rica|BOLD:AAB9792  
Alphomelon nanosomal[[744]]DHJPAR0049188|Costa Rica|BOLD:AAB9792  
Alphomelon nanosomal[[745]]DHJPAR0059477|Costa Rica|BOLD:AAB9792  
Alphomelon nanosomal[[746]]DHJPAR0054652|Costa Rica|BOLD:AAB9792  
Alphomelon nanosomal[[747]]DHJPAR0005038|Costa Rica|BOLD:AAB9792  
Alphomelon nanosomal[[748]]DHJPAR0054602|Costa Rica|BOLD:AAB9792  
Alphomelon nanosomal[[749]]DHJPAR0054600|Costa Rica|BOLD:AAB9792  
Alphomelon nanosomal[[750]]DHJPAR0034199|Costa Rica|BOLD:AAB9792  
Alphomelon nanosomal[[751]]DHJPAR0058191|Costa Rica|BOLD:AAB9792  
Alphomelon nanosomal[[752]]DHJPAR0058171|Costa Rica|BOLD:AAB9792  
Alphomelon nanosomal[[753]]DHJPAR0061690|Costa Rica|BOLD:AAB9792  
Alphomelon nanosomal[[754]]DHJPAR0035449|Costa Rica|BOLD:AAB9792  
Alphomelon nanosomal[[755]]DHJPAR0035433|Costa Rica|BOLD:AAB9792  
Alphomelon nanosomal[[756]]DHJPAR0020463|Costa Rica|BOLD:AAB9792  
Alphomelon nanosomal[[757]]DHJPAR0020783|Costa Rica|BOLD:AAB9792  
Alphomelon nanosomal[[758]]DHJPAR0012422|Costa Rica|BOLD:AAB9792  
Alphomelon nanosomal[[759]]DHJPAR0012410|Costa Rica|BOLD:AAB9792  
Alphomelon nanosomal[[760]]DHJPAR0004910|Costa Rica|BOLD:AAB9792  
Alphomelon nanosomal[[761]]DHJPAR0058960|Costa Rica|BOLD:AAB9792  
Alphomelon nanosomal[[762]]DHJPAR0060221|Costa Rica|BOLD:AAB9792  
Alphomelon nanosomal[[763]]DHJPAR0060214|Costa Rica|BOLD:AAB9792  
Alphomelon nanosomal[[764]]DHJPAR0058933|Costa Rica|BOLD:AAB9792  
Alphomelon nanosomal[[765]]DHJPAR0035428|Costa Rica|BOLD:AAB9792

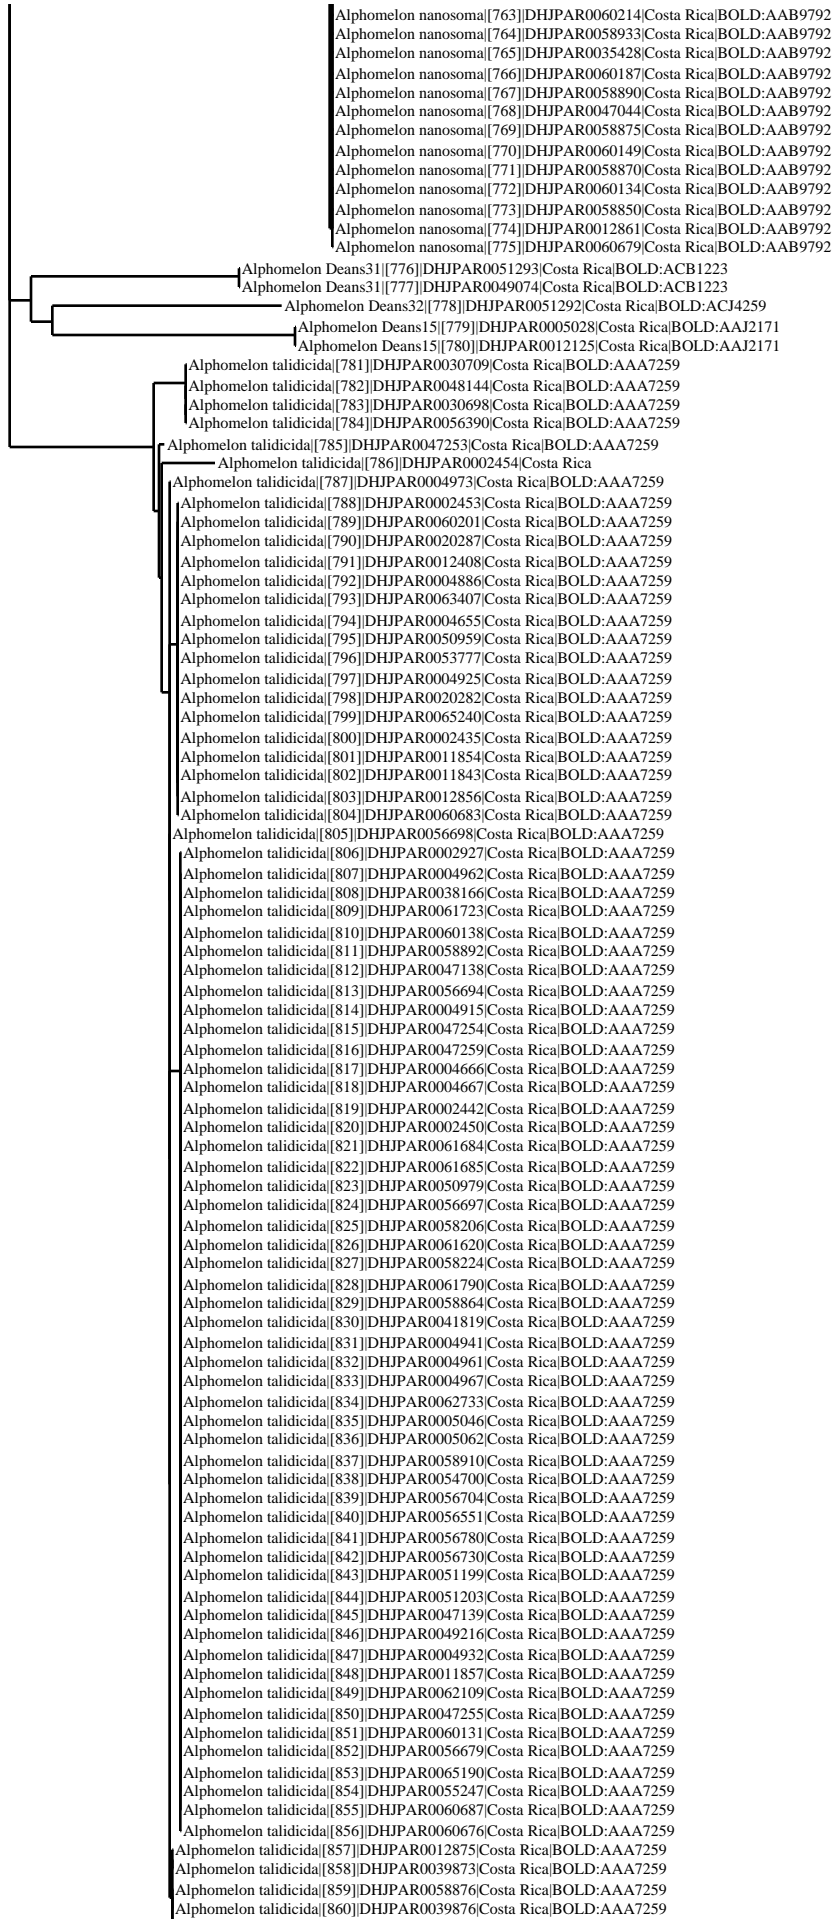



Alphomelon talidicida[859]|DHJPAR0058876|Costa Rica|BOLD:AAA7259  
Alphomelon talidicida[860]|DHJPAR0039876|Costa Rica|BOLD:AAA7259  
Alphomelon talidicida[861]|DHJPAR0047131|Costa Rica|BOLD:AAA7259  
Alphomelon talidicida[862]|DHJPAR0058887|Costa Rica|BOLD:AAA7259  
Alphomelon talidicida[863]|DHJPAR0004889|Costa Rica|BOLD:AAA7259  
Alphomelon talidicida[864]|DHJPAR0058973|Costa Rica|BOLD:AAA7259  
Alphomelon talidicida[865]|DHJPAR0004921|Costa Rica|BOLD:AAA7259  
Alphomelon talidicida[866]|DHJPAR0004909|Costa Rica|BOLD:AAA7259  
Alphomelon talidicida[867]|DHJPAR0021271|Costa Rica|BOLD:AAA7259  
Alphomelon talidicida[868]|DHJPAR0047256|Costa Rica|BOLD:AAA7259  
Alphomelon talidicida[869]|DHJPAR0056879|Costa Rica|BOLD:AAA7259  
Alphomelon talidicida[870]|DHJPAR0002463|Costa Rica|BOLD:AAA7259  
Alphomelon talidicida[871]|DHJPAR0012853|Costa Rica|BOLD:AAA7259  
Alphomelon talidicida[872]|DHJPAR0058971|Costa Rica|BOLD:AAA7259  
Alphomelon talidicida[873]|DHJPAR0011860|Costa Rica|BOLD:AAA7259  
Alphomelon talidicida[874]|DHJPAR0056685|Costa Rica|BOLD:AAA7259  
Alphomelon talidicida[875]|DHJPAR0058181|Costa Rica|BOLD:AAA7259  
Alphomelon talidicida[876]|DHJPAR0058859|Costa Rica|BOLD:AAA7259  
Alphomelon talidicida[877]|DHJPAR0004938|Costa Rica|BOLD:AAA7259  
Alphomelon talidicida[878]|DHJPAR0004963|Costa Rica|BOLD:AAA7259  
Alphomelon talidicida[879]|DHJPAR0004965|Costa Rica|BOLD:AAA7259  
Alphomelon talidicida[880]|DHJPAR0004968|Costa Rica|BOLD:AAA7259  
Alphomelon talidicida[881]|DHJPAR0005025|Costa Rica|BOLD:AAA7259  
Alphomelon talidicida[882]|DHJPAR0005065|Costa Rica|BOLD:AAA7259  
Alphomelon talidicida[883]|DHJPAR0056506|Costa Rica|BOLD:AAA7259  
Alphomelon talidicida[884]|DHJPAR0056512|Costa Rica|BOLD:AAA7259  
Alphomelon talidicida[885]|DHJPAR0060622|Costa Rica|BOLD:AAA7259  
Alphomelon talidicida[886]|DHJPAR0061724|Costa Rica|BOLD:AAA7259  
Alphomelon talidicida[887]|DHJPAR0012711|Costa Rica|BOLD:AAA7259  
Alphomelon talidicida[888]|DHJPAR0004922|Costa Rica|BOLD:AAA7259  
Alphomelon talidicida[889]|DHJPAR0034269|Costa Rica|BOLD:AAA7259  
Alphomelon talidicida[890]|DHJPAR0011863|Costa Rica|BOLD:AAA7259  
Alphomelon talidicida[891]|DHJPAR0002500|Costa Rica|BOLD:AAA7259  
Alphomelon talidicida[892]|DHJPAR0011861|Costa Rica|BOLD:AAA7259  
Alphomelon talidicida[893]|DHJPAR0002486|Costa Rica|BOLD:AAA7259  
Alphomelon talidicida[894]|DHJPAR0065237|Costa Rica|BOLD:AAA7259  
Alphomelon talidicida[895]|DHJPAR0050091|Costa Rica|BOLD:AAA7259  
Alphomelon Deans30|[896]|DHJPAR0056849|Costa Rica|BOLD:AAJ2207  
Alphomelon Deans30|[897]|DHJPAR0038181|Costa Rica|BOLD:AAJ2207  
Alphomelon Deans30|[898]|DHJPAR0030952|Costa Rica|BOLD:AAJ2207  
Alphomelon Deans30|[899]|DHJPAR0031005|Costa Rica|BOLD:AAJ2207  
Alphomelon Deans30|[900]|DHJPAR0060659|Costa Rica|BOLD:AAJ2207  
Alphomelon Deans30|[901]|DHJPAR0064167|Costa Rica|BOLD:AAJ2207  
Alphomelon Deans30|[902]|DHJPAR0059774|Costa Rica|BOLD:AAJ2207  
Alphomelon Deans30|[903]|DHJPAR0059031|Costa Rica|BOLD:AAJ2207  
Alphomelon Deans30|[904]|DHJPAR0059030|Costa Rica|BOLD:AAJ2207  
Alphomelon Janzen22|[905]|DHJPAR0064007|Costa Rica|BOLD:ABX0806  
Alphomelon Janzen22|[906]|DHJPAR0046796|Costa Rica|BOLD:ABX0806  
Alphomelon Janzen22|[907]|DHJPAR0058263|Costa Rica|BOLD:ABX0806  
Alphomelon Janzen22|[908]|DHJPAR0049470|Costa Rica|BOLD:ABX0806  
Alphomelon Janzen22|[909]|DHJPAR0058256|Costa Rica|BOLD:ABX0806  
Alphomelon Janzen22|[910]|DHJPAR0051849|Costa Rica|BOLD:ABX0806  
Alphomelon Janzen22|[911]|DHJPAR0053843|Costa Rica|BOLD:ABX0806  
Alphomelon Janzen22|[912]|DHJPAR0053818|Costa Rica|BOLD:ABX0806  
Alphomelon Janzen22|[913]|DHJPAR0053809|Costa Rica|BOLD:ABX0806  
Alphomelon Deans24|[914]|DHJPAR0047257|Costa Rica|BOLD:AAZ3562  
Alphomelon Deans24|[915]|DHJPAR0012413|Costa Rica|BOLD:AAZ3562  
Alphomelon nigriceps|[916]|CNCHYM 00045|Argentina|BOLD:AAZ9859  
Alphomelon Deans22|[917]|DHJPAR0011859|Costa Rica  
Alphomelon Deans22|[918]|DHJPAR0011845|Costa Rica|BOLD:AAD2561  
Alphomelon Deans22|[919]|DHJPAR0011838|Costa Rica|BOLD:AAD2561  
Alphomelon Deans22|[920]|DHJPAR0013665|Costa Rica|BOLD:AAD2561  
Alphomelon Deans22|[921]|DHJPAR0011852|Costa Rica|BOLD:AAD2561  
Alphomelon Deans22|[922]|DHJPAR0060662|Costa Rica|BOLD:AAD2561  
Alphomelon Deans22|[923]|DHJPAR0053814|Costa Rica|BOLD:AAD2561  
Alphomelon Deans22|[924]|DHJPAR0053819|Costa Rica|BOLD:AAD2561  
Alphomelon Deans22|[925]|DHJPAR0053835|Costa Rica|BOLD:AAD2561  
Alphomelon Deans22|[926]|DHJPAR0053837|Costa Rica|BOLD:AAD2561  
Alphomelon Deans22|[927]|DHJPAR0053842|Costa Rica|BOLD:AAD2561  
Alphomelon Deans22|[928]|DHJPAR0031007|Costa Rica|BOLD:AAD2561  
Alphomelon Deans22|[929]|DHJPAR0020201|Costa Rica|BOLD:AAD2561  
Alphomelon|[930]|07TAPACH-01765|Mexico|BOLD:AAD2561  
Alphomelon Deans22|[931]|DHJPAR0013671|Costa Rica|BOLD:AAD2561  
Alphomelon Deans22|[932]|DHJPAR0059077|Costa Rica|BOLD:AAD2561  
Alphomelon Deans19|[933]|DHJPAR0004808|Costa Rica|BOLD:ACE5969  
Alphomelon Deans19|[934]|DHJPAR0054776|Costa Rica|BOLD:ACE5969  
Alphomelon Deans19|[935]|DHJPAR0058249|Costa Rica|BOLD:ACE5969  
Alphomelon Deans19|[936]|DHJPAR0058266|Costa Rica|BOLD:ACE5969  
Alphomelon Deans19|[937]|DHJPAR0058281|Costa Rica|BOLD:ACE5969  
Alphomelon Deans19|[938]|DHJPAR0012427|Costa Rica|BOLD:ACE5969  
Alphomelon Deans19|[939]|DHJPAR0012411|Costa Rica|BOLD:ACE5969  
Alphomelon Deans19|[940]|DHJPAR0012401|Costa Rica|BOLD:ACE5969  
Alphomelon Deans19|[941]|DHJPAR0058280|Costa Rica|BOLD:ACE5969  
Alphomelon Deans19|[942]|DHJPAR0058260|Costa Rica|BOLD:ACE5969  
Alphomelon Deans19|[943]|DHJPAR0012860|Costa Rica|BOLD:ACE5969  
Alphomelon|[944]|07TAPACH-00440|Mexico|BOLD:ABZ3852  
Alphomelon|[945]|07TAPACH-00471|Mexico|BOLD:ABZ3852  
Alphomelon|[946]|07TAPACH-00439|Mexico|BOLD:ABZ3852  
Alphomelon|[947]|BIOUG90202-C03|Mexico|BOLD:AAE5720  
Alphomelon|[948]|BIOUG66151-B01|Mexico|BOLD:AAE5720  
Alphomelon|[949]|BIOUG90390-D04|Mexico|BOLD:AAE5720  
Alphomelon|[950]|BIOUG89219-F07|Mexico|BOLD:AAE5720  
Alphomelon|[951]|BIOUG90390-H03|Mexico|BOLD:AAE5720  
Alphomelon Deans23|[952]|DHJPAR0026269|Costa Rica|BOLD:AAE5720  
Alphomelon Deans23|[953]|DHJPAR0012536|Costa Rica|BOLD:AAE5720  
Alphomelon Deans23|[954]|DHJPAR0026284|Costa Rica|BOLD:AAE5720  
Alphomelon Deans23|[955]|DHJPAR0039877|Costa Rica|BOLD:AAE5720  
Alphomelon Deans23|[956]|DHJPAR0026095|Costa Rica|BOLD:AAE5720

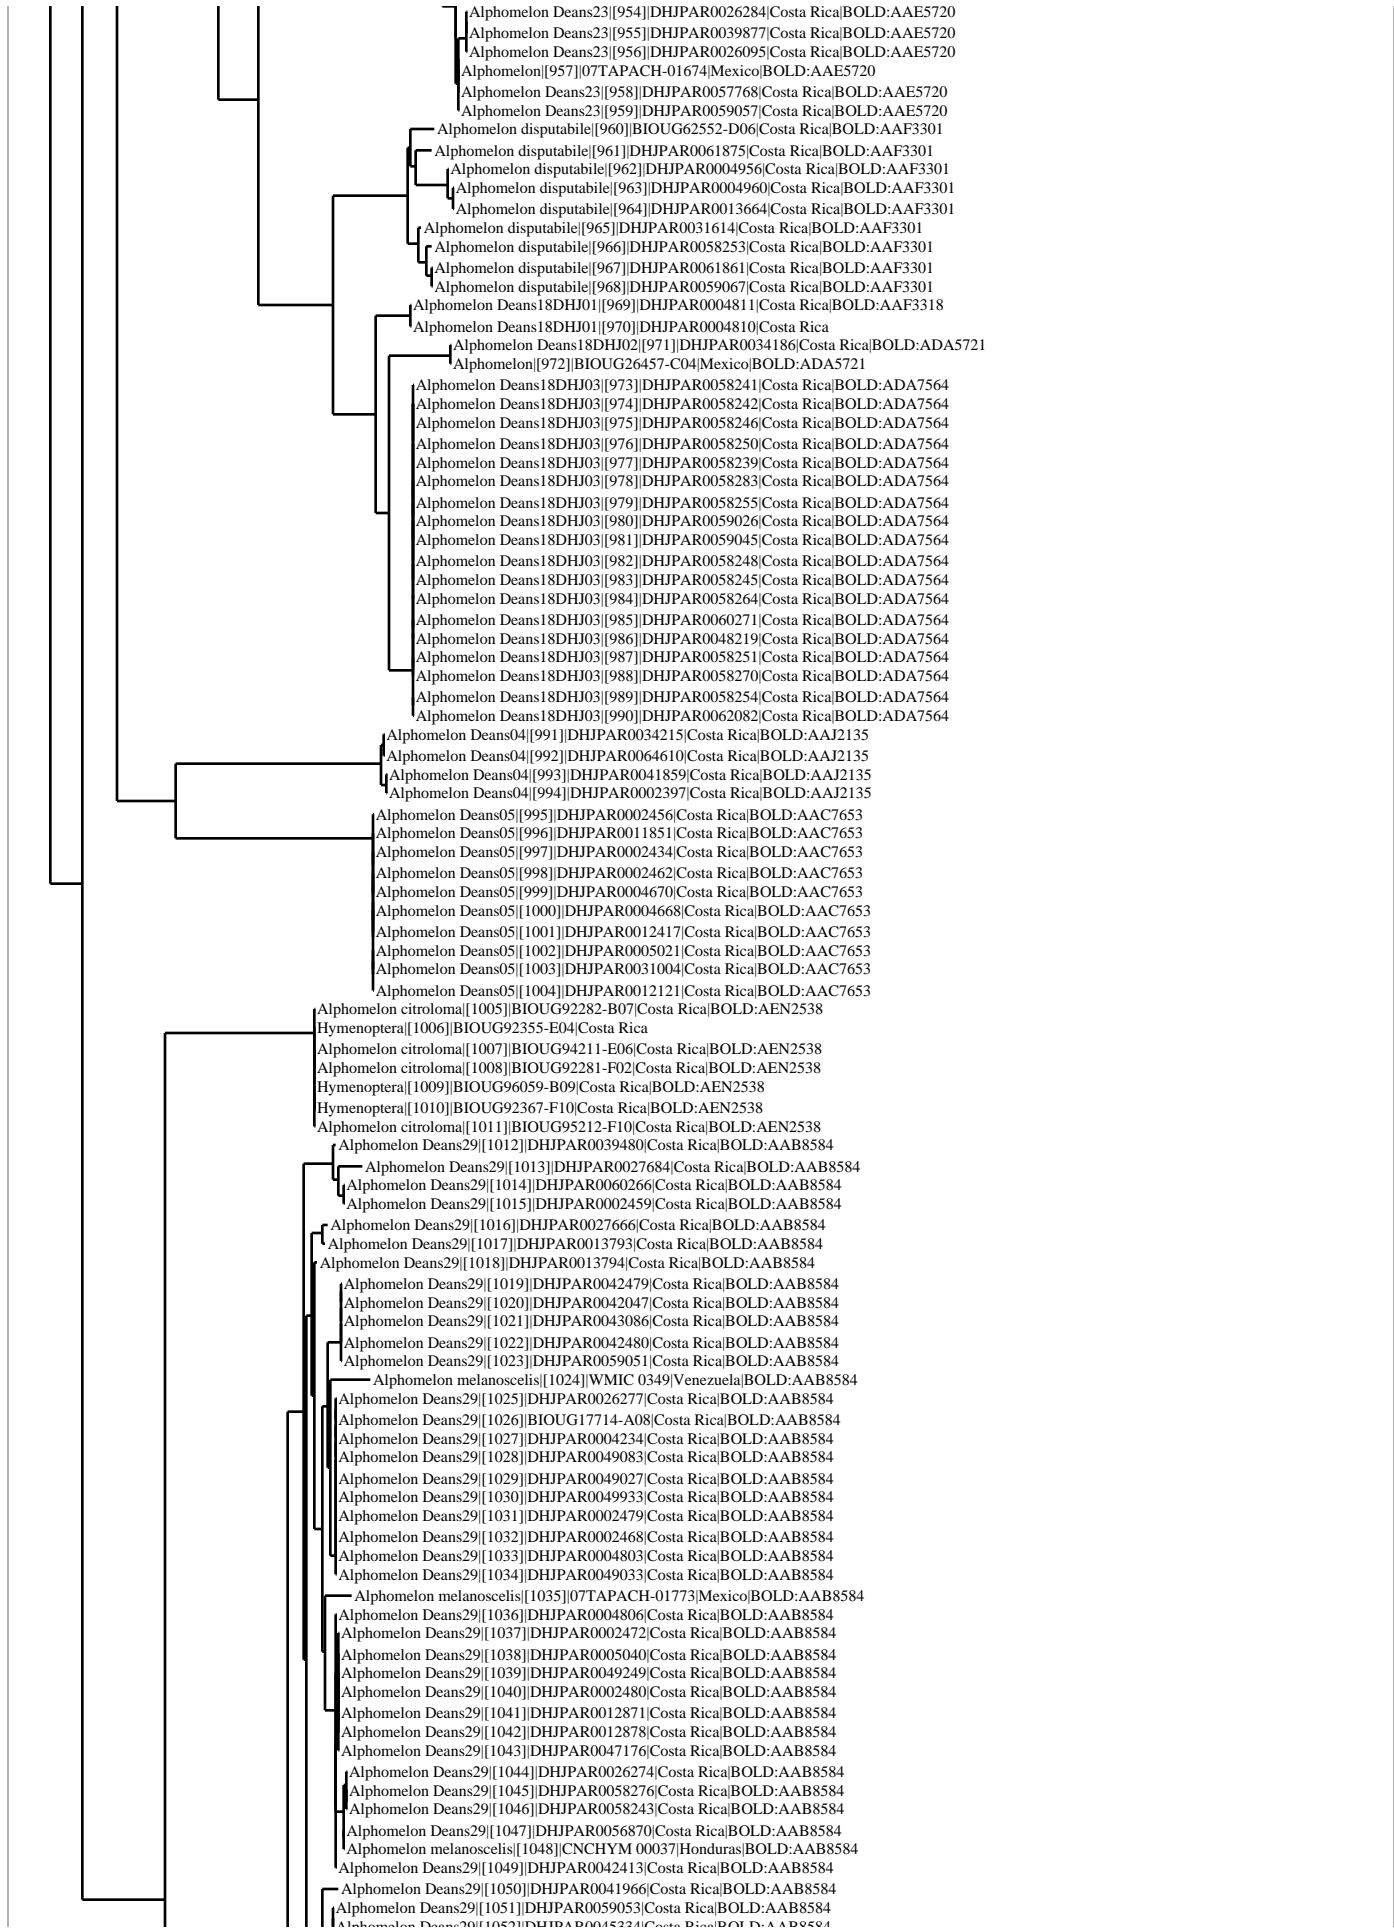



Alphomelon Deans29[1145][DHJPAR005293|Costa Rica|BOLD:AAB8584  
Alphomelon Deans29[1146][DHJPAR0042462|Costa Rica|BOLD:AAB8584  
Alphomelon Deans29[1147][DHJPAR0042458|Costa Rica|BOLD:AAB8584  
Alphomelon Deans29[1148][DHJPAR0042451|Costa Rica|BOLD:AAB8584  
Alphomelon Deans29[1149][DHJPAR0042450|Costa Rica|BOLD:AAB8584  
Alphomelon Deans29[1150][DHJPAR0042449|Costa Rica|BOLD:AAB8584  
Alphomelon Deans29[1151][DHJPAR0042442|Costa Rica|BOLD:AAB8584  
Alphomelon Deans29[1152][DHJPAR0042439|Costa Rica|BOLD:AAB8584  
Alphomelon Deans29[1153][DHJPAR0042411|Costa Rica|BOLD:AAB8584  
Alphomelon Deans29[1154][DHJPAR0058282|Costa Rica|BOLD:AAB8584  
Alphomelon Deans29[1155][DHJPAR0055325|Costa Rica|BOLD:AAB8584  
Alphomelon Deans29[1156][DHJPAR0058261|Costa Rica|BOLD:AAB8584  
Alphomelon Deans29[1157][DHJPAR0059080|Costa Rica|BOLD:AAB8584  
Alphomelon Deans29[1158][DHJPAR0059069|Costa Rica|BOLD:AAB8584  
Alphomelon Deans29[1159][DHJPAR0059064|Costa Rica|BOLD:AAB8584  
Alphomelon Deans29[1160][DHJPAR0059062|Costa Rica|BOLD:AAB8584  
Alphomelon Deans29[1161][DHJPAR0042486|Costa Rica|BOLD:AAB8584  
Alphomelon melanoscelsis[1162][BIOUG24734-D06|Argentina|BOLD:AAB8584  
Alphomelon Deans03[1163][DHJPAR0013792|Costa Rica|BOLD:ADJ6568  
Alphomelon Deans03[1164][DHJPAR0058247|Costa Rica|BOLD:ADJ6568  
Alphomelon Deans03[1165][DHJPAR0058277|Costa Rica|BOLD:ADJ6568  
Alphomelon Deans03[1166][DHJPAR0058259|Costa Rica|BOLD:ADJ6568  
Alphomelon Deans03[1167][DHJPAR0004804|Costa Rica|BOLD:ADJ6568  
Alphomelon Deans03[1168][DHJPAR0047189|Costa Rica|BOLD:ADJ6568  
Alphomelon Deans03[1169][DHJPAR0058258|Costa Rica|BOLD:ADJ6568  
Alphomelon Deans03[1170][DHJPAR0059048|Costa Rica|BOLD:ADJ6568  
Alphomelon Deans03[1171][DHJPAR0058274|Costa Rica|BOLD:ADJ6568  
Alphomelon Deans03[1172][DHJPAR0058271|Costa Rica|BOLD:ADJ6568  
Alphomelon Deans03[1173][DHJPAR0058269|Costa Rica|BOLD:ADJ6568  
Alphomelon Deans03[1174][DHJPAR0020103|Costa Rica|BOLD:ADJ6568  
Alphomelon Deans03[1175][DHJPAR0002481|Costa Rica|BOLD:ADJ6568  
Alphomelon Deans03[1176][DHJPAR0004807|Costa Rica|BOLD:ADJ6568  
Alphomelon Deans03[1177][DHJPAR0025344|Costa Rica|BOLD:ADJ6568  
Alphomelon Deans03[1178][DHJPAR0025843|Costa Rica|BOLD:ADJ6568  
Alphomelon Deans03[1179][DHJPAR0049260|Costa Rica|BOLD:ADJ6568  
Alphomelon Deans03[1180][DHJPAR0055291|Costa Rica|BOLD:ADJ6568  
Alphomelon Deans03[1181][DHJPAR0049212|Costa Rica|BOLD:ADJ6568  
Alphomelon Deans03[1182][DHJPAR0049254|Costa Rica|BOLD:ADJ6568  
Alphomelon Deans03[1183][DHJPAR0049250|Costa Rica|BOLD:ADJ6568  
Alphomelon Deans03[1184][DHJPAR0049244|Costa Rica|BOLD:ADJ6568  
Alphomelon Deans03[1185][DHJPAR0058244|Costa Rica|BOLD:ADJ6568  
Alphomelon Deans03[1186][DHJPAR0058238|Costa Rica|BOLD:ADJ6568  
Alphomelon Deans03[1187][DHJPAR0048182|Costa Rica|BOLD:ADJ6568  
Alphomelon Deans03[1188][DHJPAR0012877|Costa Rica|BOLD:ADJ6568  
Alphomelon Deans03[1189][DHJPAR0058262|Costa Rica|BOLD:ADJ6568  
Alphomelon Deans03[1190][DHJPAR0058252|Costa Rica|BOLD:ADJ6568  
Alphomelon Deans03[1191][DHJPAR0031673|Costa Rica|BOLD:ADJ6568  
Alphomelon Deans03[1192][DHJPAR0031677|Costa Rica|BOLD:ADJ6568  
Alphomelon Deans03[1193][DHJPAR0031675|Costa Rica|BOLD:ADJ6568  
Alphomelon Deans03[1194][DHJPAR0031615|Costa Rica|BOLD:ADJ6568  
Alphomelon Deans03[1195][DHJPAR0031609|Costa Rica|BOLD:ADJ6568  
Alphomelon Deans03[1196][DHJPAR0030810|Costa Rica|BOLD:ADJ6568  
Alphomelon Deans03[1197][DHJPAR0005027|Costa Rica|BOLD:ADJ6568  
Alphomelon Deans03[1198][DHJPAR0048880|Costa Rica|BOLD:ADJ6568  
Alphomelon Deans03[1199][DHJPAR0047217|Costa Rica|BOLD:ADJ6568  
Alphomelon Deans03[1200][DHJPAR0031661|Costa Rica|BOLD:ADJ6568  
Alphomelon Deans03[1201][DHJPAR0043085|Costa Rica|BOLD:ADJ6568  
Alphomelon Deans03[1202][DHJPAR0031647|Costa Rica|BOLD:ADJ6568  
Alphomelon Deans03[1203][BIOUG29282-E11|Costa Rica|BOLD:ADJ6568  
Alphomelon Deans03[1204][BIOUG05082-G11|Costa Rica|BOLD:ADJ6568  
Alphomelon Deans03[1205][BIOUG64900-A06|Costa Rica|BOLD:ADJ6568  
Alphomelon Deans03[1206][DHJPAR0031680|Costa Rica|BOLD:ADJ6568  
Alphomelon Deans03[1207][DHJPAR0031676|Costa Rica|BOLD:ADJ6568  
Alphomelon Deans03[1208][DHJPAR0031670|Costa Rica|BOLD:ADJ6568  
Alphomelon Deans03[1209][DHJPAR0031612|Costa Rica|BOLD:ADJ6568  
Alphomelon Deans03[1210][DHJPAR0049243|Costa Rica|BOLD:ADJ6568  
Alphomelon Deans03[1211][DHJPAR0049377|Costa Rica|BOLD:ADJ6568  
Alphomelon Deans03[1212][DHJPAR0031643|Costa Rica|BOLD:ADJ6568  
Alphomelon Deans03[1213][DHJPAR0059056|Costa Rica|BOLD:ADJ6568  
Alphomelon Deans03[1214][DHJPAR0047175|Costa Rica|BOLD:ADJ6568  
Alphomelon Deans03[1215][DHJPAR0059014|Costa Rica|BOLD:ADJ6568  
Alphomelon Deans03[1216][BIOUG09826-F12|Costa Rica|BOLD:ADJ6568  
Alphomelon Deans03[1217][BIOUG09740-D10|Costa Rica|BOLD:ADJ6568  
Alphomelon Deans03[1218][BIOUG10237-C12|Costa Rica|BOLD:ADJ6568  
Alphomelon Deans03[1219][BIOUG08355-D12|Costa Rica|BOLD:ADJ6568  
Alphomelon Deans03[1220][BIOUG17759-G05|Costa Rica|BOLD:ADJ6568  
Alphomelon Deans03[1221][DHJPAR0004680|Costa Rica|BOLD:ADJ6568  
Alphomelon Deans03[1222][DHJPAR0020621|Costa Rica|BOLD:ADJ6568  
Alphomelon Deans03[1223][BIOUG63286-H09|Costa Rica|BOLD:ADJ6568  
Alphomelon Deans03[1224][DHJPAR0031681|Costa Rica|BOLD:ADJ6568  
Alphomelon Deans03[1225][DHJPAR0031655|Costa Rica|BOLD:ADJ6568  
Alphomelon Deans03[1226][DHJPAR0031659|Costa Rica|BOLD:ADJ6568  
Alphomelon Deans03[1227][DHJPAR0031671|Costa Rica|BOLD:ADJ6568  
Alphomelon Deans03[1228][DHJPAR0031617|Costa Rica|BOLD:ADJ6568  
Alphomelon Deans03[1229][DHJPAR0031660|Costa Rica|BOLD:ADJ6568  
Alphomelon Deans03[1230][DHJPAR0031618|Costa Rica|BOLD:ADJ6568  
Alphomelon Deans03[1231][DHJPAR0031674|Costa Rica|BOLD:ADJ6568  
Alphomelon Deans03[1232][DHJPAR0031611|Costa Rica|BOLD:ADJ6568  
Alphomelon Deans03[1233][DHJPAR0031613|Costa Rica|BOLD:ADJ6568  
Alphomelon Deans03[1234][BIOUG63806-D10|Costa Rica|BOLD:ADJ6568  
Alphomelon Deans03[1235][BIOUG08267-D12|Costa Rica|BOLD:ADJ6568  
Alphomelon Deans03[1236][BIOUG17530-F01|Costa Rica|BOLD:ADJ6568  
Alphomelon Deans03[1237][BIOUG10017-A08|Costa Rica|BOLD:ADJ6568  
Alphomelon Deans03[1238][BIOUG13945-H05|Costa Rica|BOLD:ADJ6568  
Alphomelon Deans03[1239][BIOUG18764-F10|Costa Rica|BOLD:ADJ6568  
Alphomelon Deans03[1240][DHJPAR0031619|Costa Rica|BOLD:ADJ6568  
Alphomelon Deans03[1241][DHJPAR0025868|Costa Rica|BOLD:ADJ6568
